# Supplementary material for: Catalytic asymmetric conjugate addition of Grignard reagents to chromones
Source: Royal Society of Chemistry journal article supplement (doi:10.1039/c3cc43105c), 2013-01-01
Supplement: c3cc43105c.pdf [file c3cc43105c.pdf]

# Supporting Online Material for

## Catalytic asymmetric conjugate addition of Grignard reagents to chromones

Carlos Vila, Valentín Hornillos, Martín Fañanás-Mastral and Ben L. Feringa

*Stratingh Institute for Chemistry, University of Groningen*

*Nijenborgh 4, 9747 AG, Groningen, The Netherlands*

b.l.feringa@rug.nl

### Table of Contents

|                                                                                                                                    |     |
|------------------------------------------------------------------------------------------------------------------------------------|-----|
| General Methods                                                                                                                    | S2  |
| General procedure for the synthesis of the racemic products of the copper catalyzed 1,4-addition of Grignard reagents to chromones | S3  |
| General procedure for the asymmetric 1,4-addition of Grignard reagents to chromones                                                | S3  |
| Characterization of Products <b>2, 3, 4, 5, 6, 7</b>                                                                               | S3  |
| Characterization of Products <b>9</b>                                                                                              | S9  |
| Characterization of Products <b>10</b>                                                                                             | S9  |
| NMR spectra of characterized compounds                                                                                             | S11 |
| HPLC data of the compounds                                                                                                         | S27 |

## General Methods:

Column chromatography was performed on silica gel (Silica-P flash silica gel from Silicycle, size 40-63  $\mu\text{m}$ ). TLC was performed on silica gel 60/Kieselguhr F254. Components were visualized by UV and staining with a solution of a mixture of  $\text{KMnO}_4$  (10 g) and  $\text{K}_2\text{CO}_3$  (10 g) in  $\text{H}_2\text{O}$  (500 mL). Mass spectra were recorded on a AEI-MS-902 mass spectrometer (EI+) or a LTQ Orbitrap XL (ESI+).  $^1\text{H}$ - and  $^{13}\text{C}$ -NMR were recorded on a Varian AMX400 (400 and 101 MHz, respectively) using  $\text{CDCl}_3$  as solvent. Chemical shift values are reported in ppm with the solvent resonance as the internal standard ( $\text{CHCl}_3$ :  $\delta$  7.26 for  $^1\text{H}$ ,  $\delta$  77.0 for  $^{13}\text{C}$ ). Data are reported as follows: chemical shifts, multiplicity (s = singlet, d = doublet, t = triplet, q = quartet, p = pentet, br = broad, m = multiplet), coupling constants (Hz), and integration. Optical rotations were measured in  $\text{CHCl}_3$  on a *Schmidt + Haensch* polarimeter (Polartronic MH8) with a 10 cm cell ( $c$  given in g/100 mL). Conversion of the reaction was determined by GC (GC, HP6890: MS HP5973) with an HP5 column (Agilent Technologies, Palo Alto, CA). Enantiomeric excess values were determined by HPLC analysis using a Shimadzu LC-10ADVP HPLC equipped with a Shimadzu SPD-M10AVP diode array detector. All reactions were carried out under a nitrogen atmosphere using oven dried glassware and using standard Schlenk techniques. All solvents were reagent grade and were dried and distilled prior to use, if necessary. Tetrahydrofuran (THF), tert-butyl methyl ether (*t*-BuOMe) and diethylether ( $\text{Et}_2\text{O}$ ) were distilled over Na/benzophenone. Toluene and dichloromethane ( $\text{CH}_2\text{Cl}_2$ ) were distilled over calcium hydride. All the ligands, copper salts and chromanones were purchased from Aldrich, ABCR and Acros and used as received. Grignard reagents  $\text{RMgBr}$  ( $\text{R}$  = Et, *n*-pentyl, *n*-hexyl, *i*-Bu, 3-pentyl, dodecyl, cyclopentyl) were purchased from Aldrich. Phenethylmagnesium bromide and but-3-en-1-ylmagnesium bromide were prepared from the corresponding alkyl bromides and magnesium turnings in  $\text{Et}_2\text{O}$  following standard procedures. Grignard reagents were titrated using *sec*-BuOH and catalytic amounts of 1,10-phenanthroline.

### General procedure for the synthesis of the racemic product of the copper catalyzed 1,4-addition of Grignard reagents to chromones

CuBr·SMe<sub>2</sub> (0.01 mmol, 2.02 mg) and PPh<sub>3</sub> (0.012 mmol, 6.3 mg) were dissolved in dry DCM (2.0 mL) and the mixture was stirred at room temperature for 10 min. The mixture was cooled to -80 °C and subsequently the corresponding Grignard reagent solution (1.25 equiv.) were added dropwise. The reaction mixture was stirred at -80 °C for another 10 min. Then a solution of chromonone (0.2 mmol) in DCM (1.0 mL) was added dropwise. The reaction mixture was stirred until TLC (*n*-pentane:EtOAc 9:1) showed full conversion and quenched with saturated aqueous NH<sub>4</sub>Cl solution (2 mL). The mixture was separated and the water layer was extracted with DCM (3×5 mL). The combined organic layers were dried over MgSO<sub>4</sub>, filtered and the solvent was evaporated under *vacuo*. Purification by flash chromatography over silica gel, using *n*-pentane:Et<sub>2</sub>O 9:1 afforded the desired compounds. (The reaction in some cases shown 1,2 and 1,4 addition products)

### General procedure for the asymmetric 1,4-addition of Grignard reagents to chromones:

CuBr·SMe<sub>2</sub> (0.01 mmol, 2.02 mg) and **L4** (*R,S*)-Rev-Josiphos (0.012 mmol, 7.2 mg) were dissolved in dry DCM (2.0 mL) and the mixture was stirred at room temperature for 10 min. The mixture was cooled to -80 °C and subsequently the corresponding Grignard reagent solution (1.25 equiv.) was added dropwise. The reaction mixture was stirred at -80 °C for another 10 min. Then a solution of chromonone (0.4 mmol) in DCM (1.0 mL) was added slowly over 1h using a syringe pump. The reaction was stirred until TLC (*n*-pentane:EtOAc 9:1) showed full conversion and quenched with saturated aqueous NH<sub>4</sub>Cl solution (2 mL). The mixture was separated and the water layer was extracted with DCM (3×5 mL). The combined organic layers were dried over MgSO<sub>4</sub>, filtered and the solvent was evaporated under *vacuo*. Purification by flash chromatography over silica gel, using *n*-pentane:Et<sub>2</sub>O 9:1 afforded the desired compounds.

### Characterization of products 2, 3, 4, 5, 6, 7

#### (*R*)-2-ethylchroman-4-one (2a)<sup>1</sup>

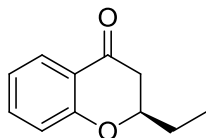

Synthesized according the general procedure, obtained in 98% yield; oil; enantiomeric excess was determined by HPLC (Chiracel ODH), hexane:*i*-PrOH 99:1, 0.5 mL/min, major enantiomer *t<sub>r</sub>* = 14.2 min, minor enantiomer *t<sub>r</sub>* = 16.0 min, ee= 95%; [ $\alpha$ ]<sub>D</sub><sup>25</sup> = +51.5 (c 1.0, CHCl<sub>3</sub>); <sup>1</sup>H NMR (400 MHz, CDCl<sub>3</sub>):  $\delta$  7.85 (dd, *J* = 7.8, 1.3 Hz, 1H), 7.44 (td, *J* = 7.8, 1.6 Hz, 1H), 7.03-6.88 (m, 2H), 4.45-4.29 (m, 1H), 2.66 (d, *J* = 7.8 Hz, 2H), 1.88 (dp, *J* = 14.7, 7.4 Hz,

1H), 1.81-1.69 (m, 1H), 1.05 (t,  $J = 7.5$  Hz, 3H) ppm;  $^{13}\text{C}$  NMR (100 MHz,  $\text{CDCl}_3$ )  $\delta$  192.5, 161.6, 135.8, 126.8, 121.0, 120.9, 117.8, 78.9, 42.4, 27.9, 9.2 ppm; HRMS (ESI) calculated for  $\text{C}_{11}\text{H}_{13}\text{O}_2$   $[\text{M} + \text{H}]$  177.0910 found 177.0910.

**(R)-2-pentylchroman-4-one (2b)**

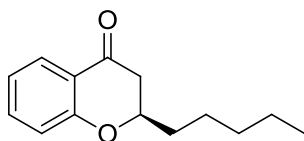

Synthesized according the general procedure, obtained in 80% yield; oil; enantiomeric excess was determined by HPLC (Chiracel OBH), hexane:i-PrOH 99:1, 0.5 mL/min, minor enantiomer  $t_r = 12.3$  min, major enantiomer  $t_r = 12.9$  min, ee= 96%;  $[\alpha]_{\text{D}}^{25} = +48.9$  (c 1.05,  $\text{CHCl}_3$ );  $^1\text{H}$  NMR (400 MHz,  $\text{CDCl}_3$ ):  $\delta$  7.87 (dd,  $J = 7.8, 1.7$  Hz, 1H), 7.46 (td,  $J = 8.0, 1.6$  Hz, 1H), 7.02-6.94 (m, 2H), 4.43 (qd,  $J = 7.6, 5.2$  Hz, 1H), 2.68 (d,  $J = 7.5$  Hz, 2H), 1.88 (dddd,  $J = 12.8, 10.1, 7.4, 5.3$  Hz, 1H), 1.75-1.64 (m, 1H), 1.61-1.41 (m, 2H), 1.39-1.29 (m, 4H), 0.91 (t,  $J = 7.5$  Hz, 3H) ppm;  $^{13}\text{C}$  NMR (100 MHz,  $\text{CDCl}_3$ )  $\delta$  192.6, 161.7, 135.9, 126.9, 121.1, 121.0, 117.8, 77.9, 43.0, 34.9, 31.5, 24.5, 22.5, 14.0 ppm; HRMS (ESI) calculated for  $\text{C}_{14}\text{H}_{19}\text{O}_2$   $[\text{M} + \text{H}]$  219.1380 found 219.1379.

**(R)-2-hexylchroman-4-one (2c)**

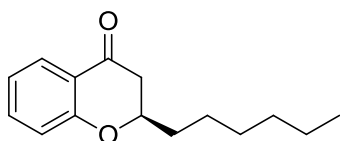

Synthesized according the general procedure, obtained in 87% yield; oil; enantiomeric excess was determined by HPLC (Chiracel ODH), hexane:i-PrOH 99:1, 0.5 mL/min, major enantiomer  $t_r = 12.1$  min, minor enantiomer  $t_r = 12.8$  min, ee= 96%;  $[\alpha]_{\text{D}}^{25} = +51.3$  (c 1.09,  $\text{CHCl}_3$ );  $^1\text{H}$  NMR (400 MHz,  $\text{CDCl}_3$ ):  $\delta$  7.86 (dd,  $J = 7.8, 1.6$  Hz, 1H), 7.44 (td,  $J = 7.8, 1.5$  Hz, 1H), 7.00-6.94 (m, 2H), 4.42 (qd,  $J = 7.6, 5.4$  Hz, 1H), 2.67 (d,  $J = 7.9$  Hz, 2H), 1.93-1.81 (m, 1H), 1.69 (ddd,  $J = 13.9, 10.4, 5.4$  Hz, 1H), 1.60-1.40 (m, 2H), 1.39-1.21 (m, 6H), 0.89 (t,  $J = 6.7$  Hz, 3H) ppm;  $^{13}\text{C}$  NMR (100 MHz,  $\text{CDCl}_3$ )  $\delta$  192.6, 161.7, 135.9, 126.9, 121.1, 121.0, 117.9, 77.9, 43.0, 34.9, 29.0, 24.8, 22.6, 14.0 ppm; HRMS (ESI) calculated for  $\text{C}_{15}\text{H}_{21}\text{O}_2$   $[\text{M} + \text{H}]$  233.1536 found 233.1537.

**(R)-2-dodecylchroman-4-one (2d)**

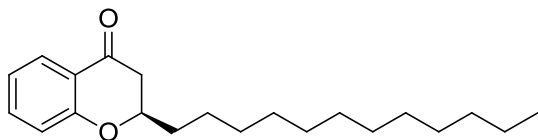

Synthesized according the general procedure, obtained in 53% yield; oil; enantiomeric excess was determined by HPLC (Chiracel ODH), hexane:i-PrOH 99:1, 0.5 mL/min, major enantiomer  $t_r = 10.6$  min, minor enantiomer  $t_r = 11.5$  min, ee= 86%;  $[\alpha]_D^{25} = +24.5$  (c 0.85, CHCl<sub>3</sub>); <sup>1</sup>H NMR (400 MHz, CDCl<sub>3</sub>):  $\delta$  7.82 (dd,  $J = 7.8, 1.6$  Hz, 1H), 7.41 (td,  $J = 7.8, 2.0$  Hz, 1H), 6.96-6.91 (m, 2H), 4.41-4.35 (m, 1H), 2.63 (d,  $J = 7.9$  Hz, 2H), 1.89-1.77 (m, 1H), 1.71-1.60 (m, 1H), 1.55-1.35 (m, 2H), 1.33-1.10 (m, 18H), 0.83 (t,  $J = 6.8$  Hz, 3H) ppm; <sup>13</sup>C NMR (100 MHz, CDCl<sub>3</sub>)  $\delta$  192.6, 161.6, 135.8, 126.9, 121.0, 120.9, 117.8, 77.9, 42.9, 34.9, 31.9, 29.63, 29.59, 29.57, 29.49, 29.43, 29.32, 29.29, 24.8, 22.6, 14.0 ppm; HRMS (ESI) calculated for C<sub>21</sub>H<sub>33</sub>O<sub>2</sub> [M + H] 317.2475 found 317.2477.

**(R)-2-isobutylchroman-4-one (2e)**

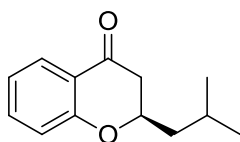

Synthesized according the general procedure, obtained in 82% yield; oil; enantiomeric excess was determined by HPLC (Chiracel ODH), hexane:i-PrOH 99:1, 0.5 mL/min, major enantiomer  $t_r = 12.4$  min, minor enantiomer  $t_r = 13.2$  min, ee= 98%;  $[\alpha]_D^{25} = +57.2$  (c 0.97, CHCl<sub>3</sub>); <sup>1</sup>H NMR (400 MHz, CDCl<sub>3</sub>):  $\delta$  7.76 (dd,  $J = 7.8, 1.5$  Hz, 1H), 7.34 (td,  $J = 7.8, 1.6$  Hz, 1H), 6.90-6.83 (m, 2H), 4.45-4.36 (m, 1H), 2.61-2.48 (m, 2H), 1.88-1.71 (m, 2H), 1.34 (ddd,  $J = 13.8, 7.9, 4.6$  Hz, 1H), 0.864 (d,  $J = 6.4$  Hz, 3H), 0.857 (d,  $J = 6.4$  Hz, 3H) ppm; <sup>13</sup>C NMR (100 MHz, CDCl<sub>3</sub>)  $\delta$  192.5, 161.6, 135.9, 126.9, 121.1, 121.0, 117.9, 76.3, 43.9, 43.4, 24.2, 23.0, 22.2 ppm; HRMS (ESI) calculated for C<sub>13</sub>H<sub>17</sub>O<sub>2</sub> [M + H] 205.1223 found 205.1223.

**(R)-2-(but-3-en-1-yl)chroman-4-one (2f)**

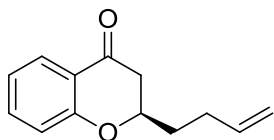

Synthesized according the general procedure, obtained in 79% yield; oil; enantiomeric excess was determined by HPLC (Chiracel ODH), hexane:i-PrOH 99:1, 0.5 mL/min, major enantiomer  $t_r = 15.3$  min, minor enantiomer  $t_r = 17.1$  min, ee= 87%;  $[\alpha]_D^{25} = +44.4$  (c 0.9, CHCl<sub>3</sub>); <sup>1</sup>H NMR (400 MHz, CDCl<sub>3</sub>):  $\delta$  7.82 (d,  $J = 7.3$  Hz, 1H), 7.41 (t,  $J = 7.3$  Hz, 1H), 6.98-6.90 (m, 2H), 5.79 (ddt,  $J = 16.9, 10.1, 6.6$  Hz, 1H), 5.03 (d,  $J = 17.1$  Hz, 1H), 4.97 (d,  $J = 10.2$  Hz, 1H), 4.45-4.37 (m, 1H), 2.64 (d,  $J = 7.7$  Hz, 2H), 2.33-2.16 (m, 2H), 1.95 (td,  $J = 14.2, 8.0$  Hz, 1H), 1.74 (ddd,  $J = 13.9, 8.9, 6.7$  Hz, 1H) ppm; <sup>13</sup>C NMR (100 MHz, CDCl<sub>3</sub>)  $\delta$  192.3, 161.5, 137.2, 135.9, 126.9, 121.2, 121.0, 117.8, 117.5, 77.0, 42.9, 34.0, 29.0 ppm; HRMS (ESI) calculated for C<sub>13</sub>H<sub>15</sub>O<sub>2</sub> [M + H] 203.1067 found 203.1066.

**(R)-2-phenethylchroman-4-one (2g)<sup>2</sup>**

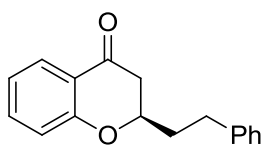

Synthesized according the general procedure, obtained in 77% yield; oil; enantiomeric excess was determined by HPLC (Chiracel ODH), hexane:i-PrOH 95:5, 0.5 mL/min, major enantiomer  $t_r = 29.2$  min, minor enantiomer  $t_r = 12.5$  min, ee= 75%;  $[\alpha]_D^{25} = +56.7$  (c 0.8, CHCl<sub>3</sub>); <sup>1</sup>H NMR (400 MHz, CDCl<sub>3</sub>):  $\delta$  7.89 (dd,  $J = 8.1, 1.7$  Hz, 1H), 7.49 (td,  $J = 7.8, 1.6$  Hz, 1H), 7.32-7.29 (m, 2H), 7.26-7.19 (m, 3H), 7.03-7.00 (m, 2H), 4.44 (ddt,  $J = 11.0, 8.6, 4.5$  Hz, 1H), 2.96-2.81 (m, 2H), 2.77-2.65 (m, 2H), 2.23 (dtd,  $J = 14.2, 8.6, 5.7$  Hz, 1H), 2.00 (dddd,  $J = 13.9, 9.2, 7.2, 4.4$  Hz, 1H) ppm; <sup>13</sup>C NMR (100 MHz, CDCl<sub>3</sub>)  $\delta$  192.3, 161.5, 140.9, 136.0, 128.5, 128.4, 127.0, 126.2, 121.3, 121.1, 117.9, 76.8, 43.0, 36.5, 31.1 ppm; HRMS (ESI) calculated for C<sub>17</sub>H<sub>17</sub>O<sub>2</sub> [M + H] 253.1223 found 253.1224.

**(S)-2-(pentan-3-yl)chroman-4-one (2h)**

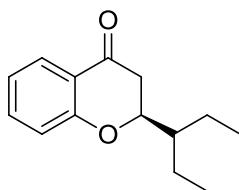

Synthesized according the general procedure, obtained in 68% yield; oil; enantiomeric excess was determined by HPLC (Chiracel ODH), hexane:i-PrOH 99:1, 0.5 mL/min, major enantiomer  $t_r = 11.4$  min, minor enantiomer  $t_r = 12.3$  min, ee= 84%;  $[\alpha]_D^{25} = +53.5$  (c 0.92, CHCl<sub>3</sub>); <sup>1</sup>H NMR (400 MHz, CDCl<sub>3</sub>):  $\delta$  7.87 (dd,  $J = 7.9, 1.5$  Hz, 1H), 7.44 (ddd,  $J = 8.4, 7.3, 1.8$  Hz, 1H), 7.01-6.94 (m, 2H), 4.43 (ddd,  $J = 13.5, 4.9, 2.70$  Hz, 1H), 2.75 (dd,  $J = 16.6, 13.5$  Hz, 1H), 2.60 (dd,  $J = 16.6, 2.7$  Hz, 1H), 1.69-1.59 (m, 2H), 1.58-1.49 (m, 2H), 1.36 (dt,  $J = 15.7, 7.9$  Hz, 1H), 0.96 (t,  $J = 7.3$  Hz, 3H), 0.95 (t,  $J = 7.4$  Hz, 3H) ppm; <sup>13</sup>C NMR (100 MHz, CDCl<sub>3</sub>)  $\delta$  193.2, 162.1, 135.8, 126.9, 121.0, 117.9, 79.5, 44.8, 40.0, 21.5, 21.3, 11.4 ppm; HRMS (ESI) calculated for C<sub>14</sub>H<sub>19</sub>O<sub>2</sub> [M + H] 219.1380 found 219.1380.

**(S)-2-cyclopentylchroman-4-one (2i)**

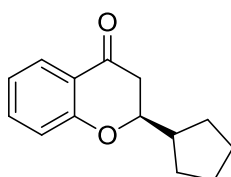

Synthesized according the general procedure, obtained in 79% yield; oil; enantiomeric excess was determined by HPLC (Chiracel ODH), hexane:i-PrOH 99:1, 0.5 mL/min, major enantiomer  $t_r = 13.8$  min, minor enantiomer  $t_r = 14.5$  min, ee= 97%;  $[\alpha]_D^{25} = +72.1$  (c 0.9,

$\text{CHCl}_3$ );  $^1\text{H}$  NMR (400 MHz,  $\text{CDCl}_3$ ):  $\delta$  7.86 (dd,  $J = 7.8, 1.3$  Hz, 1H), 7.45 (td,  $J = 7.8, 1.7$  Hz, 1H), 7.00-6.93 (m, 2H), 4.22 (ddd,  $J = 9.6, 7.8, 5.7$  Hz, 1H), 2.74-2.64 (m, 2H), 2.28-2.20 (m, 1H), 1.97-1.89 (m, 1H), 1.79-1.74 (m, 1H), 1.72-1.50 (m, 5H), 1.37-1.25 (m, 1H) ppm;  $^{13}\text{C}$  NMR (100 MHz,  $\text{CDCl}_3$ )  $\delta$  192.8, 161.8, 135.9, 126.9, 121.04, 121.0, 117.9, 81.7, 44.1, 42.2, 28.8, 28.4, 25.5, 25.4 ppm; HRMS (ESI) calculated for  $\text{C}_{14}\text{H}_{17}\text{O}_2$   $[\text{M} + \text{H}]$  217.1223 found 217.1223.

**(R)-2-ethyl-6-methylchroman-4-one (3)**

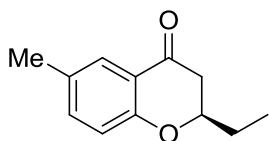

Synthesized according the general procedure, obtained in 93% yield; oil; enantiomeric excess was determined by HPLC (Chiracel ODH), hexane:i-PrOH 99:1, 0.5 mL/min, major enantiomer  $t_r = 13.8$  min, minor enantiomer  $t_r = 15.2$  min, ee= 92%;  $[\alpha]_{\text{D}}^{25} = +69.6$  (c 1.0,  $\text{CHCl}_3$ );  $^1\text{H}$  NMR (400 MHz,  $\text{CDCl}_3$ ):  $\delta$  7.64 (d,  $J = 1.3$  Hz, 1H), 7.25 (dd,  $J = 8.4, 2.1$  Hz, 1H), 6.86 (d,  $J = 8.4$ , 1H), 4.32 (qd,  $J = 7.6, 5.6$  Hz, 1H), 2.64 (d,  $J = 8.0$  Hz, 2H), 2.28 (s, 3H), 1.87 (dp,  $J = 14.4, 7.3$  Hz, 1H), 1.80-1.68 (m, 1H), 1.05 (t,  $J = 7.5$  Hz, 3H) ppm;  $^{13}\text{C}$  NMR (100 MHz,  $\text{CDCl}_3$ )  $\delta$  192.8, 159.7, 137.0, 130.5, 126.4, 120.6, 117.6, 79.0, 42.6, 28.0, 20.4, 9.3 ppm; HRMS (ESI) calculated for  $\text{C}_{12}\text{H}_{15}\text{O}_2$   $[\text{M} + \text{H}]$  191.1067 found 191.1065.

**(R)-2-ethyl-6-fluorochroman-4-one (4)**

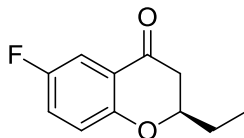

Synthesized according the general procedure, obtained in 75% yield; oil; enantiomeric excess was determined by HPLC (Chiracel ODH), hexane:i-PrOH 99:1, 0.5 mL/min, major enantiomer  $t_r = 12.9$  min, minor enantiomer  $t_r = 14.3$  min, ee= 92%;  $[\alpha]_{\text{D}}^{25} = +72.3$  (c 1.11,  $\text{CHCl}_3$ );  $^1\text{H}$  NMR (400 MHz,  $\text{CDCl}_3$ ):  $\delta$  7.45 (dd,  $J = 8.3, 3.1$  Hz, 1H), 7.12 (td,  $J = 8.6, 3.2$  Hz, 1H), 6.89 (dd,  $J = 9.0, 4.2$ , 1H), 4.29 (m, 1H), 2.66-2.62 (m, 2H), 1.83 (dp,  $J = 14.7, 7.4$  Hz, 1H), 1.77-1.65 (m, 1H), 1.01 (t,  $J = 7.5$  Hz, 3H) ppm;  $^{19}\text{F}$  NMR (376 MHz,  $\text{CDCl}_3$ )  $\delta$  -121.9 (td,  $J_{\text{H-F}} = 8.0, 4.3$ )  $^{13}\text{C}$  NMR (100 MHz,  $\text{CDCl}_3$ )  $\delta$  191.8 (d,  $J_{\text{C-F}} = 1.8$ ), 158.0 (d,  $J_{\text{C-F}} = 31.6$ ), 156.9 (d,  $J_{\text{C-F}} = 208.6$ ), 123.4 (d,  $J_{\text{C-F}} = 24.6$ ), 121.4 (d,  $J_{\text{C-F}} = 6.5$ ), 119.5 (d,  $J_{\text{C-F}} = 7.3$ ), 111.8 (d,  $J_{\text{C-F}} = 23.2$ ), 79.3, 42.2, 27.8, 9.2 ppm; HRMS (ESI) calculated for  $\text{C}_{11}\text{H}_{12}\text{FO}_2$   $[\text{M} + \text{H}]$  195.0816 found 195.0815.

**(R)-6-chloro-2-ethylchroman-4-one (5)**

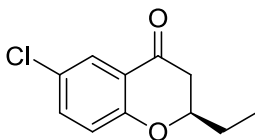

Synthesized according the general procedure, obtained in 85% yield; oil; enantiomeric excess was determined by HPLC (Chiracel ODH), hexane:i-PrOH 99:1, 0.5 mL/min, major enantiomer  $t_r = 13.6$  min, minor enantiomer  $t_r = 15.2$  min, ee= 90%;  $[\alpha]_D^{25} = +78.2$  (c 1.01, CHCl<sub>3</sub>); <sup>1</sup>H NMR (400 MHz, CDCl<sub>3</sub>):  $\delta$  7.82 (d,  $J = 2.7$  Hz, 1H), 7.40 (dd,  $J = 8.8, 2.7$  Hz, 1H), 6.93 (d,  $J = 8.8$  Hz, 1H), 4.36 (ddt,  $J = 11.0, 6.9, 5.5$  Hz, 1H), 2.72-2.61 (m, 2H), 1.89 (dp,  $J = 14.7, 7.4$  Hz, 1H), 1.83-1.71 (m, 1H), 1.07 (t,  $J = 7.5$  Hz, 3H) ppm; <sup>13</sup>C NMR (100 MHz, CDCl<sub>3</sub>)  $\delta$  191.4, 160.1, 135.7, 126.6, 126.2, 121.7, 119.6, 79.3, 42.2, 27.9, 9.2 ppm; HRMS (ESI) calculated for C<sub>11</sub>H<sub>12</sub>ClO<sub>2</sub> [M + H] 211.0520 found 211.0519.

**(R)-6-bromo-2-ethylchroman-4-one (6)**

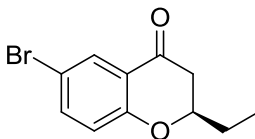

Synthesized according the general procedure, obtained in 81% yield; oil; enantiomeric excess was determined by HPLC (Chiracel ODH), hexane:i-PrOH 99:1, 0.5 mL/min, major enantiomer  $t_r = 14.4$  min, minor enantiomer  $t_r = 15.9$  min, ee= 89%;  $[\alpha]_D^{25} = +64.3$  (c 1.15, CHCl<sub>3</sub>); <sup>1</sup>H NMR (400 MHz, CDCl<sub>3</sub>):  $\delta$  7.88 (d,  $J = 2.2$  Hz, 1H), 7.45 (dd,  $J = 8.8, 2.1$  Hz, 1H), 6.80 (d,  $J = 8.8$  Hz, 1H), 4.32-4.24 (m, 1H), 2.65-2.52 (m, 2H), 1.81 (dp,  $J = 14.7, 7.4$  Hz, 1H), 1.75-1.54 (m, 1H), 0.99 (t,  $J = 7.5$  Hz, 3H) ppm; <sup>13</sup>C NMR (100 MHz, CDCl<sub>3</sub>)  $\delta$  191.3, 160.5, 138.5, 129.3, 122.2, 120.0, 113.7, 79.3, 42.1, 27.8, 9.2 ppm; HRMS (ESI) calculated for C<sub>11</sub>H<sub>12</sub>BrO<sub>2</sub> [M + H] 255.0015 found 255.0016.

**(R)-2-ethyl-7-methoxychroman-4-one (7)**

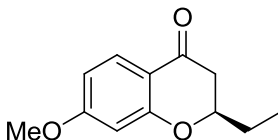

Synthesized according the general procedure, obtained in 81% yield; oil; enantiomeric excess was determined by HPLC (Chiracel ODH), hexane:i-PrOH 99:1, 0.5 mL/min, minor enantiomer  $t_r = 28.9$  min, minor enantiomer  $t_r = 30.3$  min, ee= 92%;  $[\alpha]_D^{25} = +50.9$  (c 0.82, CHCl<sub>3</sub>); <sup>1</sup>H NMR (400 MHz, CDCl<sub>3</sub>):  $\delta$  7.78 (d,  $J = 8.8$  Hz, 1H), 6.53 (dd,  $J = 8.8, 2.4$  Hz, 1H), 6.40 (d,  $J = 2.3$  Hz, 1H), 4.38-4.29 (m, 1H), 3.81 (s, 3H), 2.66-2.54 (m, 2H), 1.86 (dp,  $J = 14.7, 7.3$  Hz, 1H), 1.80-1.68 (m, 1H), 1.05 (t,  $J = 7.5$  Hz, 3H) ppm; <sup>13</sup>C NMR (100 MHz, CDCl<sub>3</sub>)  $\delta$



191.2, 166.0, 163.6, 128.6, 114.9, 109.7, 100.6, 79.4, 55.6, 42.2, 28.0, 9.3 ppm; HRMS (ESI) calculated for  $C_{12}H_{15}O_3$  [M + H] 207.1016 found 207.1016.

**(2*R*,3*R*)-2-ethyl-3-(hydroxy(phenyl)methyl)chroman-4-one (9)**

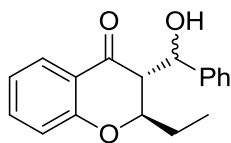

CuBr·SMe<sub>2</sub> (0.01 mmol, 2.02 mg) and **L4** (*R,S*)-Rev-Josiphos (0.012 mmol, 7.2 mg) were dissolved in dry DCM (2.0 mL) and the mixture was stirred at room temperature for 10 min. The mixture was cooled to -80 °C and subsequently the corresponding Grignard reagent solution (1.25 equiv.) was added dropwise. The reaction mixture was stirred at -80 °C for another 10 min. Then a solution of chromonone **2a** (0.4 mmol, 58.4 mg) in DCM (1.0 mL) was added slowly over 1h using a syringe pump. The reaction was stirred until TLC (*n*-pentane:EtOAc 9:1) showed full conversion. PhCHO (1.6 mmol, 150 μL) was added and the mixture was stirred at room temperature for 3 h. After that the reaction mixture was quenched with saturated aqueous NH<sub>4</sub>Cl solution (2 mL). The mixture was separated and the water layer was extracted with DCM (3×5 mL). The combined organic layers were dried over MgSO<sub>4</sub>, filtered and the solvent was evaporated under *vacuo*. Purification by flash chromatography over silica gel, using *n*-pentane:Et<sub>2</sub>O 9:1 afforded the desired compound **9** was obtained as an oil (101.5 mg, 0.36 mmol, 90% yield, dr: 1:1.1); <sup>1</sup>H NMR (400 MHz, CDCl<sub>3</sub>): δ 7.90 (dd, *J* = 7.8, 1.5 Hz, 1H), 7.75 (d, *J* = 7.8 Hz, 1H), 7.54-7.20 (m, 12H), 7.01 (t, *J* = 7.5 Hz, 1H), 6.99-6.92 (m, 3H), 5.15 (d, *J* = 6.7 Hz, 1H), 4.98\* (d, *J* = 9.1 Hz, 1H), 4.72-4.63 (m, 1H), 4.04\* (ddd, *J* = 9.4, 5.0, 2.3 Hz, 1H), 2.90 (dd, *J* = 6.6, 4.8 Hz, 1H), 2.73\* (dd, *J* = 9.1, 2.3 Hz, 1H), 1.87-1.67 (m, 2H), 1.63-1.51 (m, 1H), 1.50-1.39\* (m, 1H), 0.95 (t, *J* = 7.3 Hz, 3H), 0.84\* (t, *J* = 7.3 Hz, 3H) ppm; <sup>13</sup>C NMR (100 MHz, CDCl<sub>3</sub>) δ 193.8, 193.4, 159.6, 158.9, 141.4, 141.1, 136.6, 136.4, 128.7, 128.5, 128.43, 128.39, 128.0, 127.22, 127.0, 126.8, 126.8, 126.3, 121.3, 121.1, 118.20, 118.17, 79.7, 79.3, 72.9, 72.6, 57.9, 57.0, 25.1, 24.7, 9.84, 9.75 ppm; HRMS (ESI) calculated for  $C_{18}H_{19}O_3$  [M + H] 283.1329 found 283.1328.

**(*R*)-4-ethyl-3,4-dihydro-2*H*-benzo[*b*][1,4]dioxepin-2-one (10)**

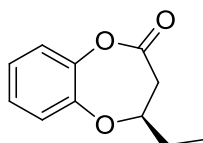

(*R*)-2-ethylchroman-4-one (**2a**) (0.25 mmol, 44.1 mg) and MCPBA (0.625 mmol, 107.9 mg) were dissolved in 5 mL of ClCH<sub>2</sub>CH<sub>2</sub>Cl, and the mixture was heated to 60 °C. The reaction mixture was stirred until TLC (*n*-pentane:EtOAc 9:1) showed full conversion and quenched with

saturated aqueous NaHCO<sub>3</sub> solution (10 mL) and 15 mL of DCM. The mixture was separated and the organic layer was washed with aq. NaHCO<sub>3</sub> (2×7 mL). The combined organic layers were dried over MgSO<sub>4</sub>, filtered and the solvent was evaporated under *vacuo*. Purification by flash chromatography over silica gel, using *n*-pentane:Et<sub>2</sub>O 9:1 afforded the desired compound **10** as an oil (33.7 mg, 0.178 mmol, 71% yield); oil; enantiomeric excess was determined by HPLC (Chiracel ODH), hexane:i-PrOH 99:1, 0.5 mL/min, major enantiomer *t<sub>r</sub>* = 30.9 min, minor enantiomer *t<sub>r</sub>* = 23.7 min, ee= 93%; [ $\alpha$ ]<sub>D</sub><sup>25</sup> = +67.1 (c 0.5, CHCl<sub>3</sub>); <sup>1</sup>H NMR (400 MHz, CDCl<sub>3</sub>):  $\delta$  7.19-7.08 (m, 4H), 4.62-4.53 (m, 1H), 2.83 (dd, *J* = 13.2, 5.5 Hz, 1H), 2.65 (dd, *J* = 13.2, 7.5 Hz, 1H), 1.93-1.80 (m, 1H), 1.67-1.55 (m, 1H), 1.08 (t, *J* = 7.4 Hz, 3H) ppm; <sup>13</sup>C NMR (100 MHz, CDCl<sub>3</sub>)  $\delta$  168.2, 145.9, 144.8, 126.7, 125.5, 124.1, 120.2, 84.0, 37.5, 27.5, 10.0 ppm; HRMS (ESI) calculated for C<sub>11</sub>H<sub>13</sub>O<sub>3</sub> [M + H] 193.0859 found 193.0858.

## References:

- 1-. L. Wang, X. Liu, Z. Dong, X. Fu, and X. Feng, *Angew. Chem. Int. Ed.* 2008, **47**, 8670.
- 2-. M. M. Biddle, M. Lin and K. A. Scheidt, *J. Am. Chem. Soc.* 2007, **129**, 3830-3831.

## NMR Spectra of Characterized Compounds

### (*R*)-2-ethylchroman-4-one

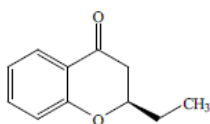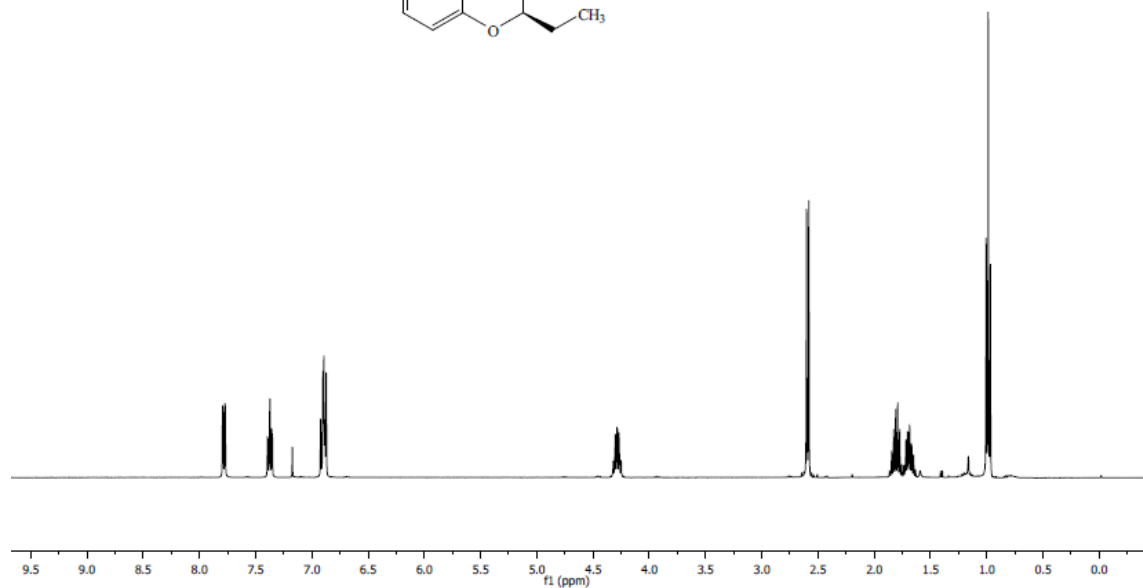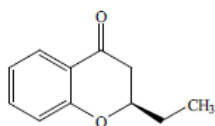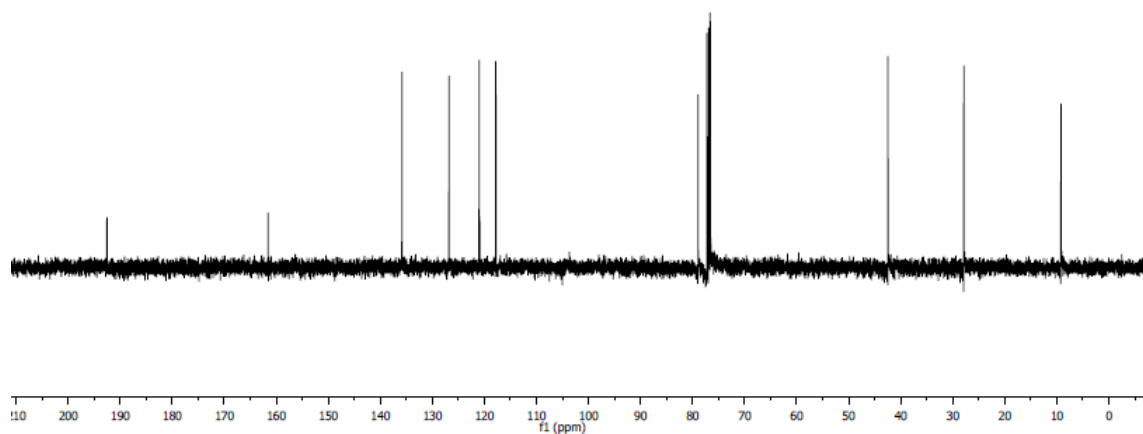

**(R)-2-pentylchroman-4-one**

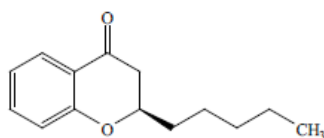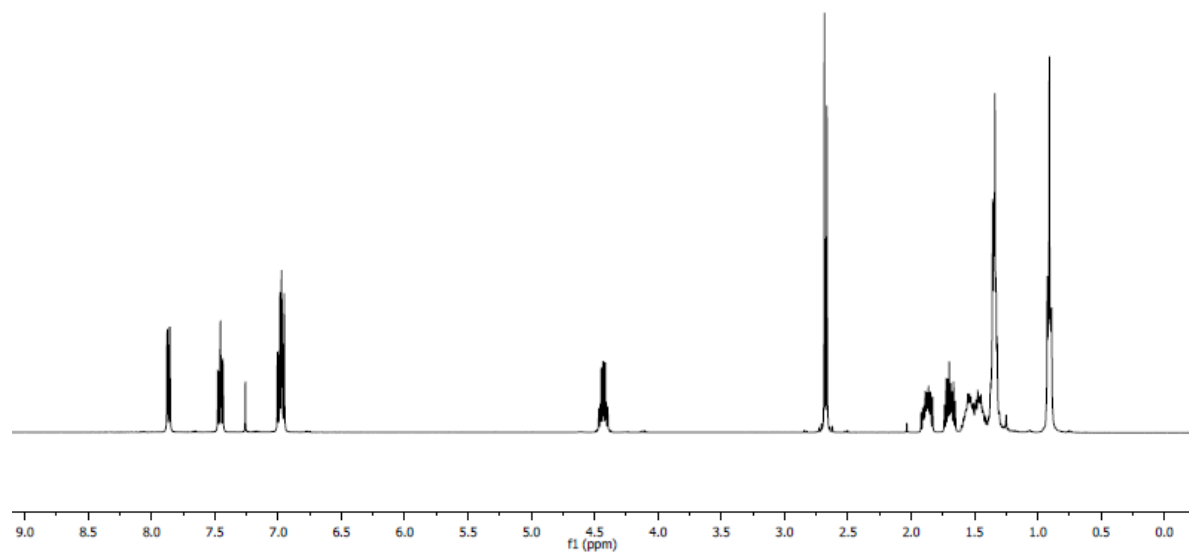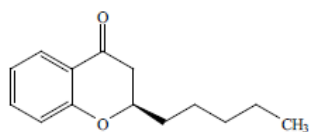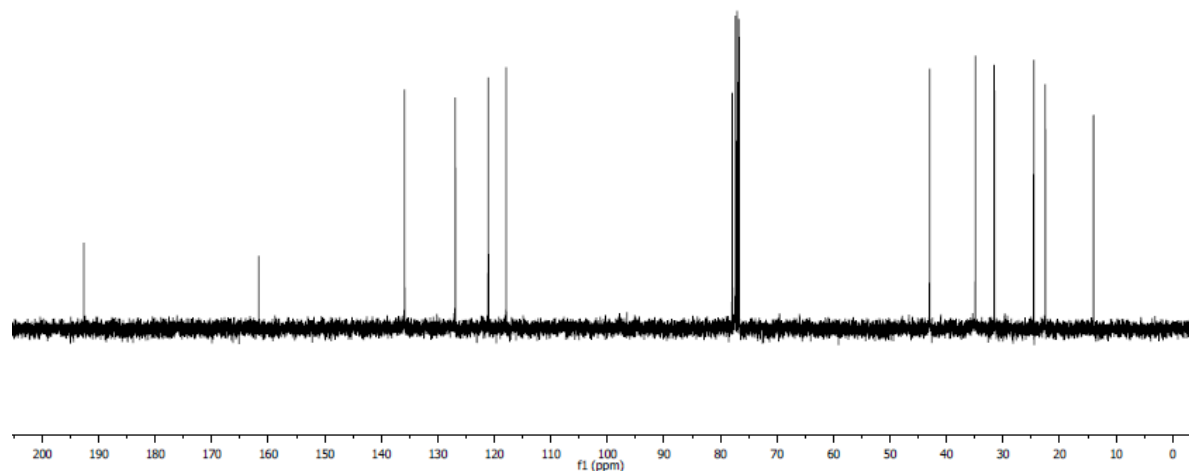

**(R)-2-hexylchroman-4-one**

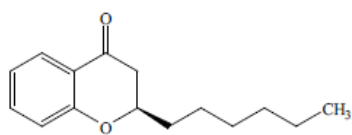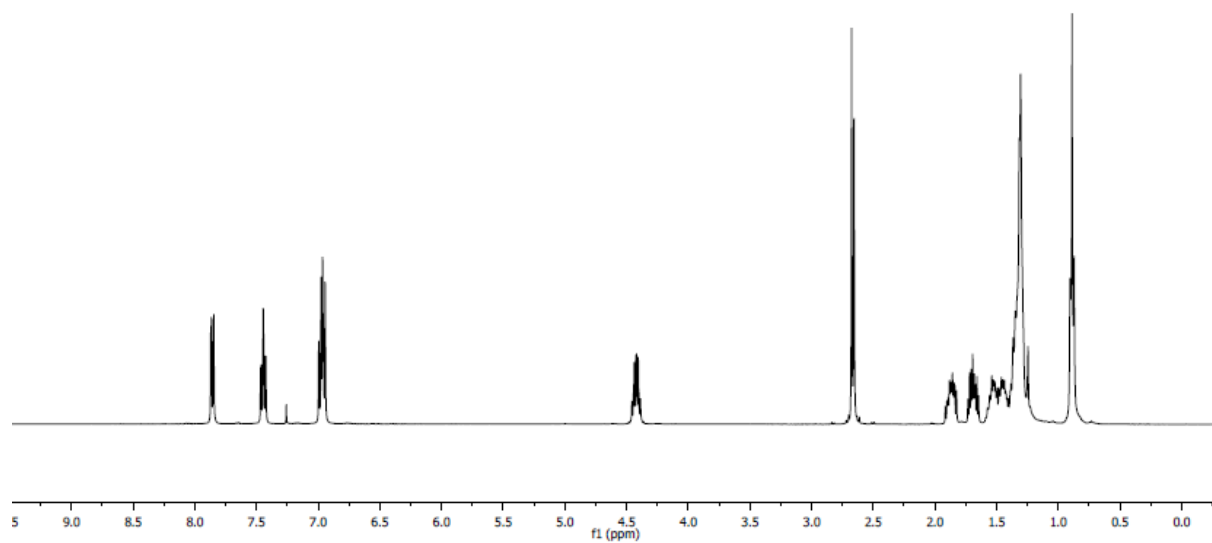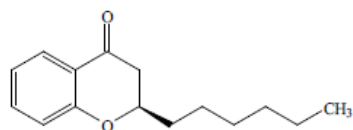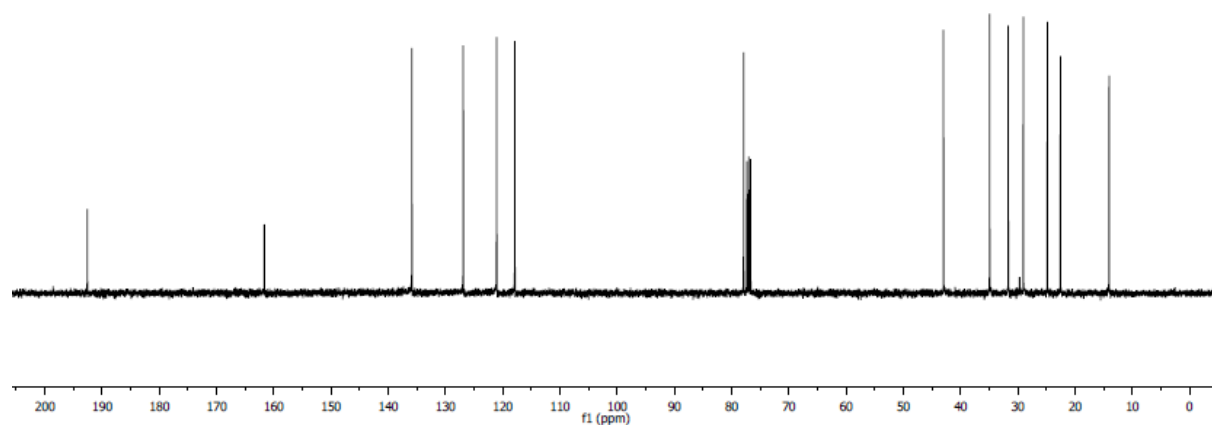

**(R)-2-dodecylchroman-4-one**

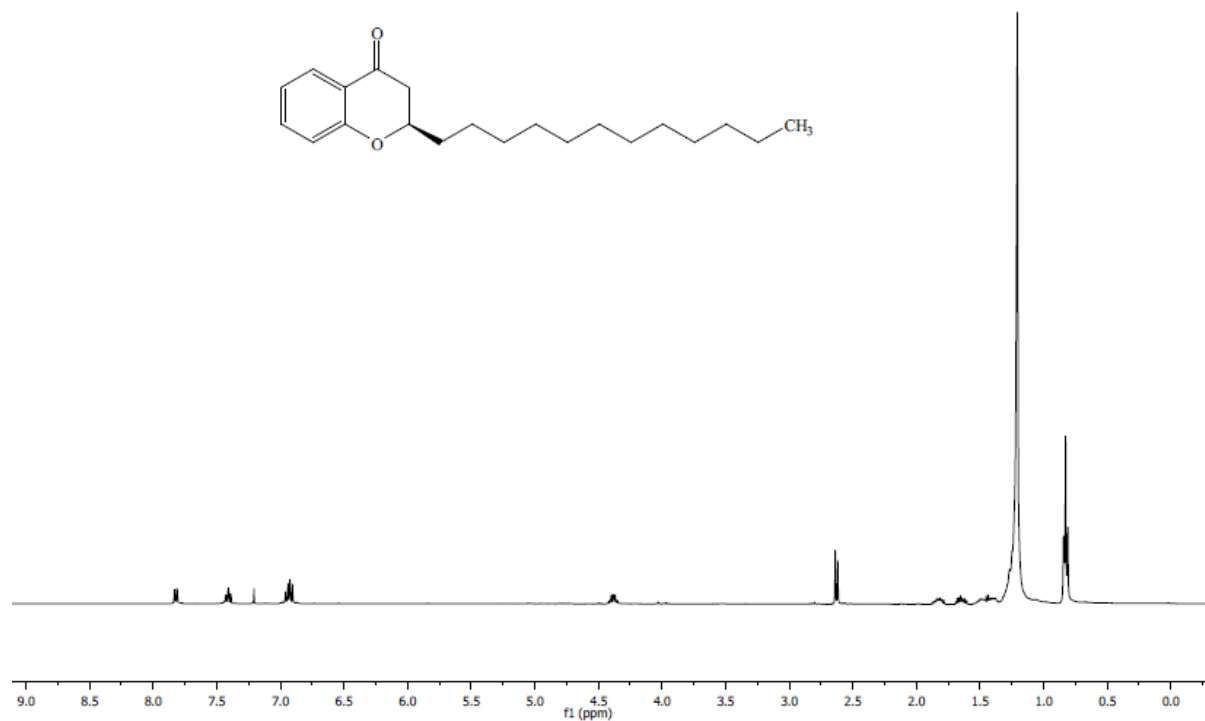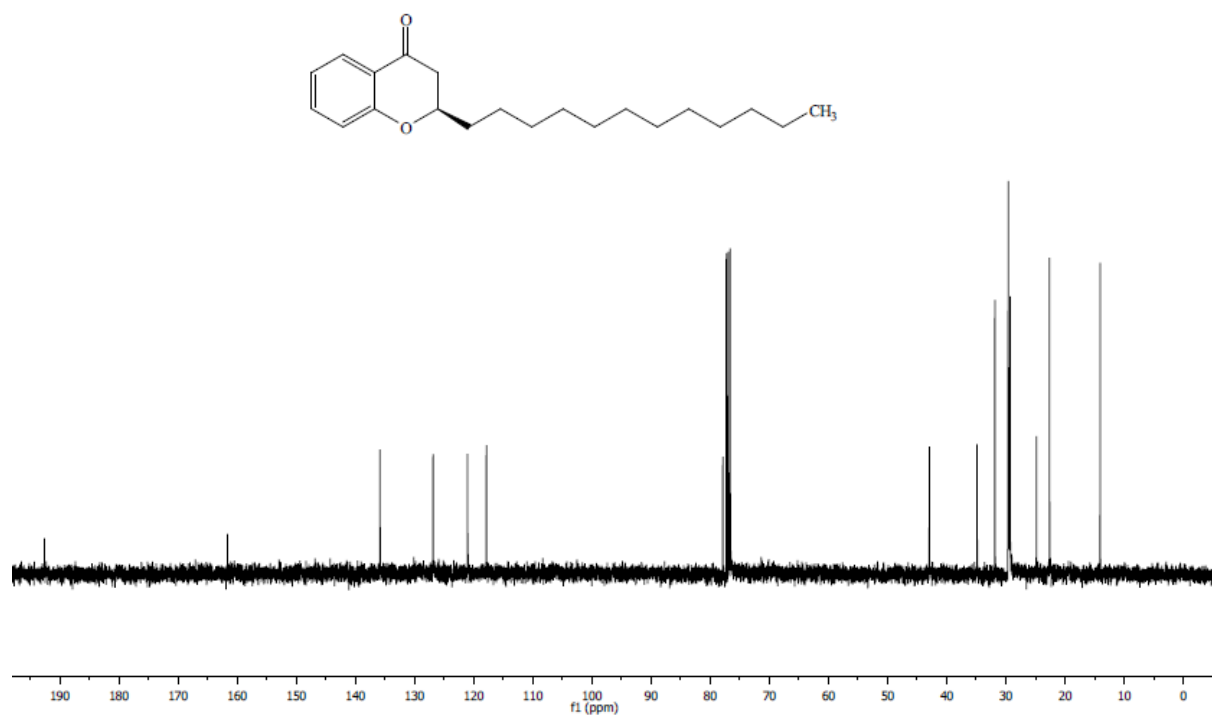

**(*R*)-2-isobutylchroman-4-one**

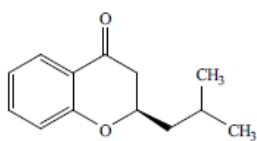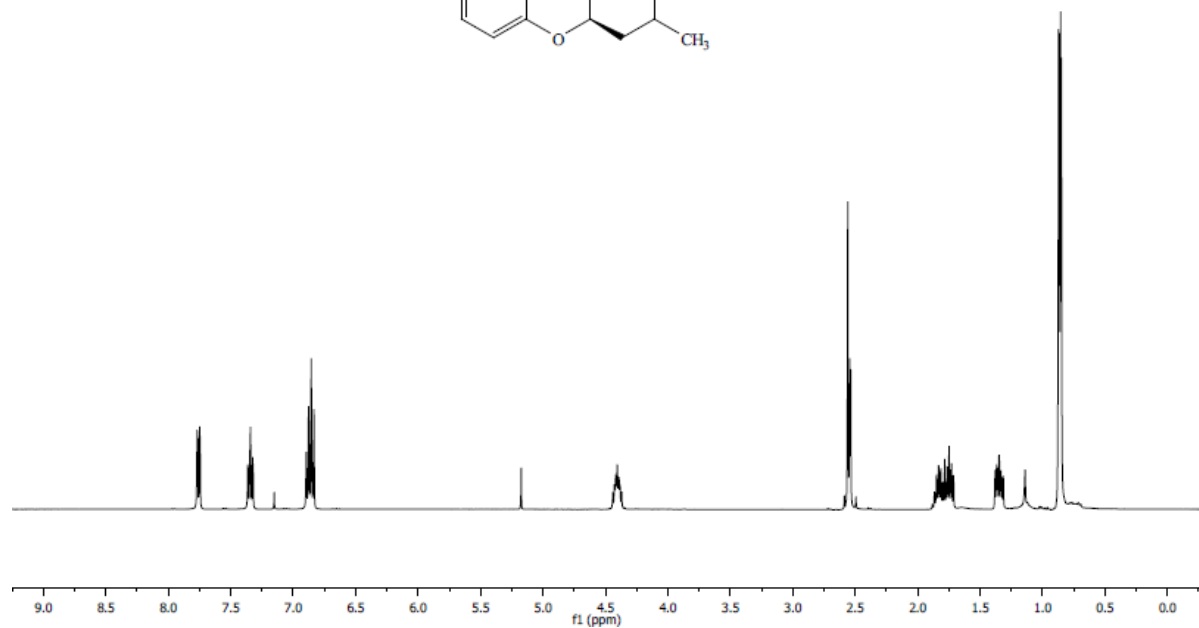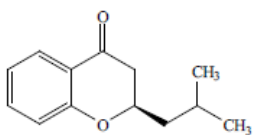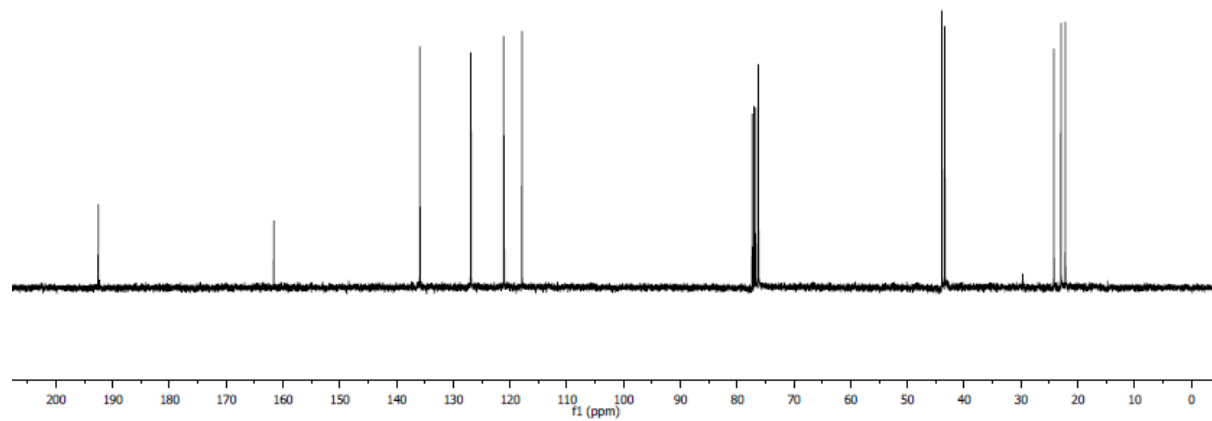

**(R)-2-(but-3-en-1-yl)chroman-4-one**

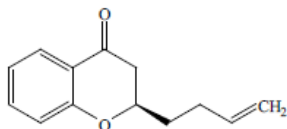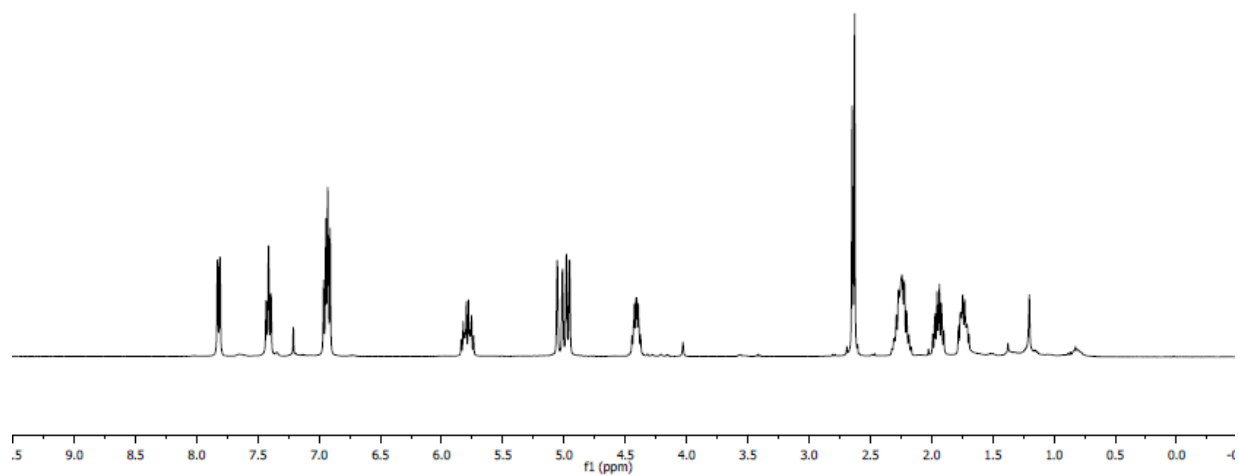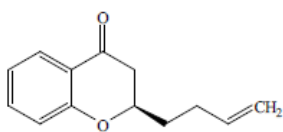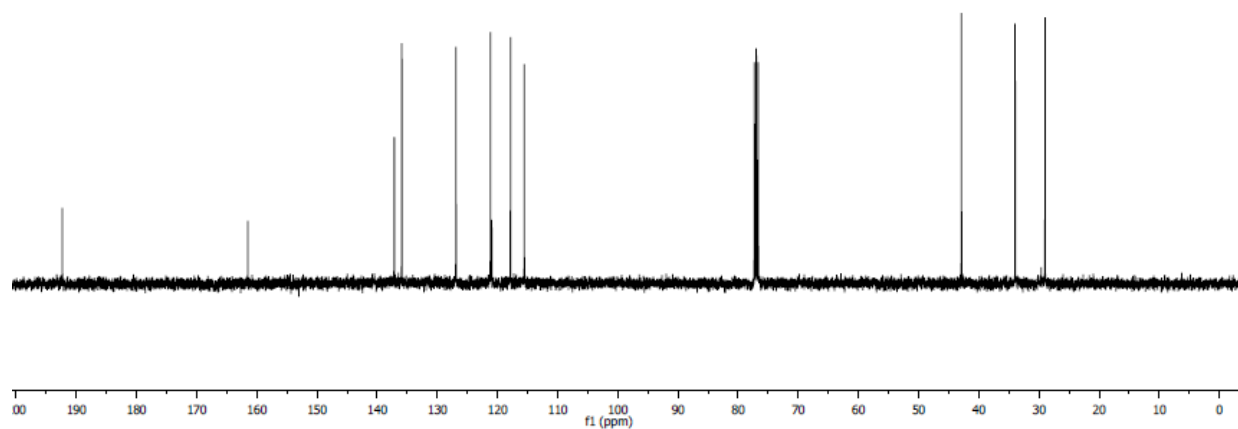



**(*R*)-2-phenethylchroman-4-one**

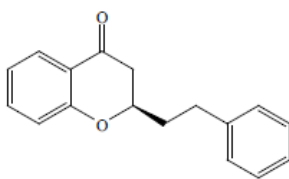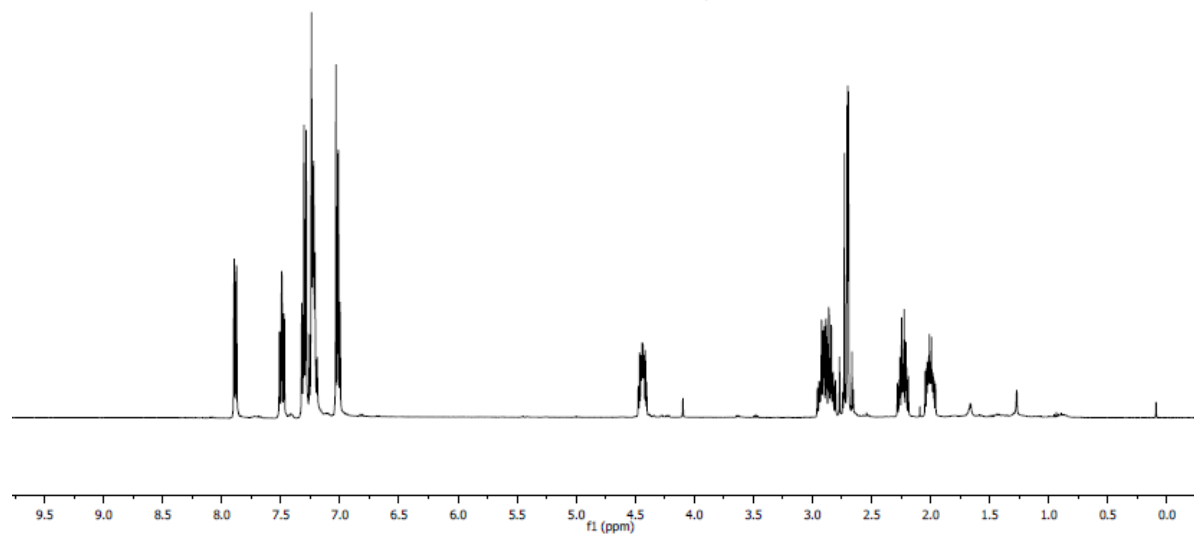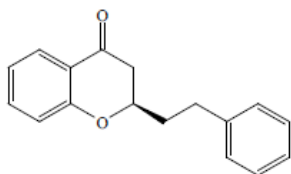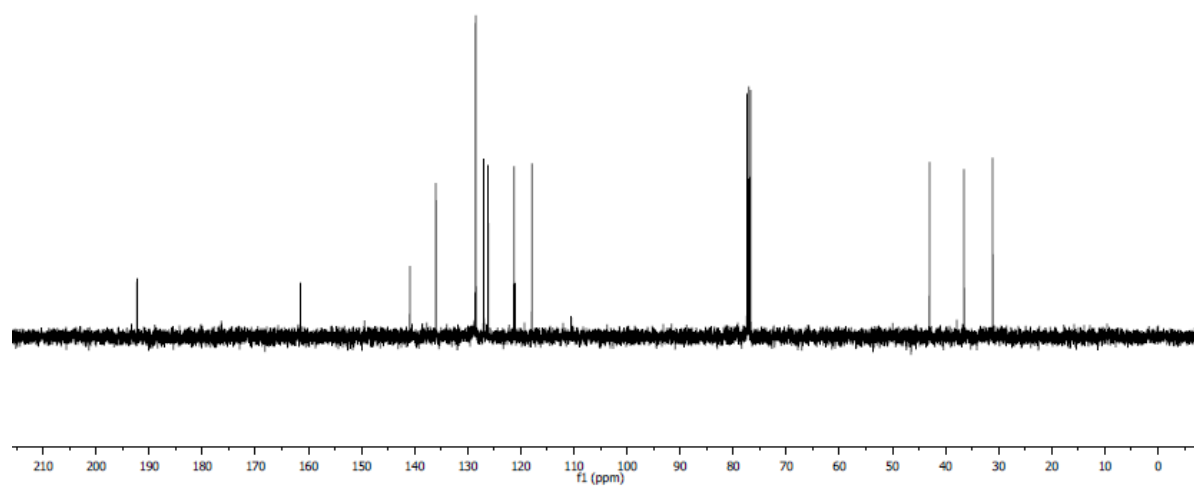

**(S)-2-(pentan-3-yl)chroman-4-one**

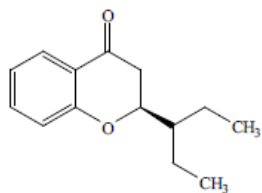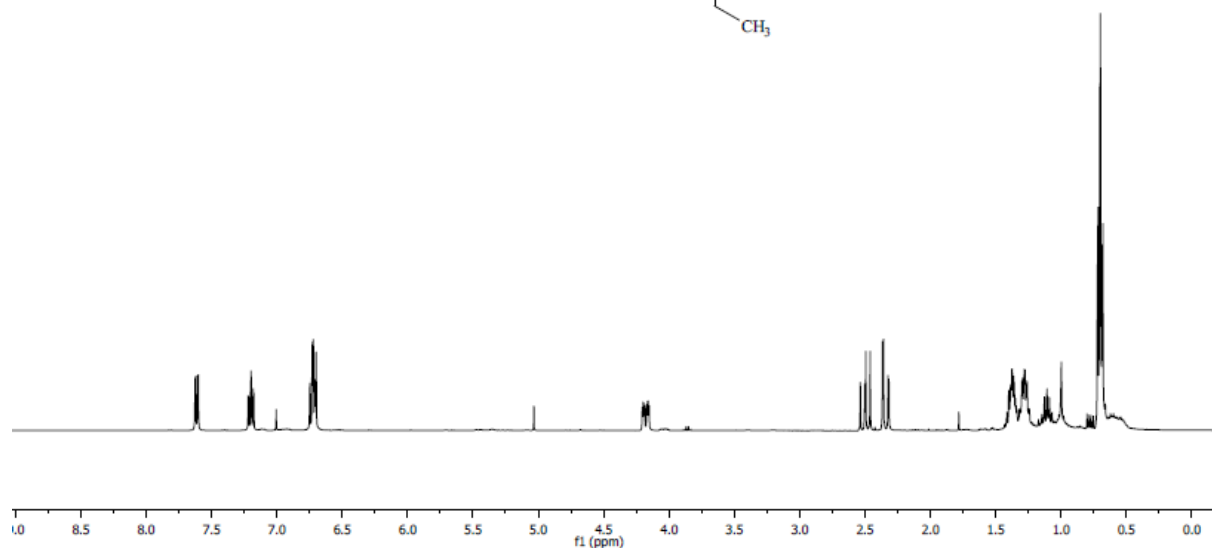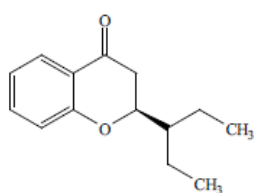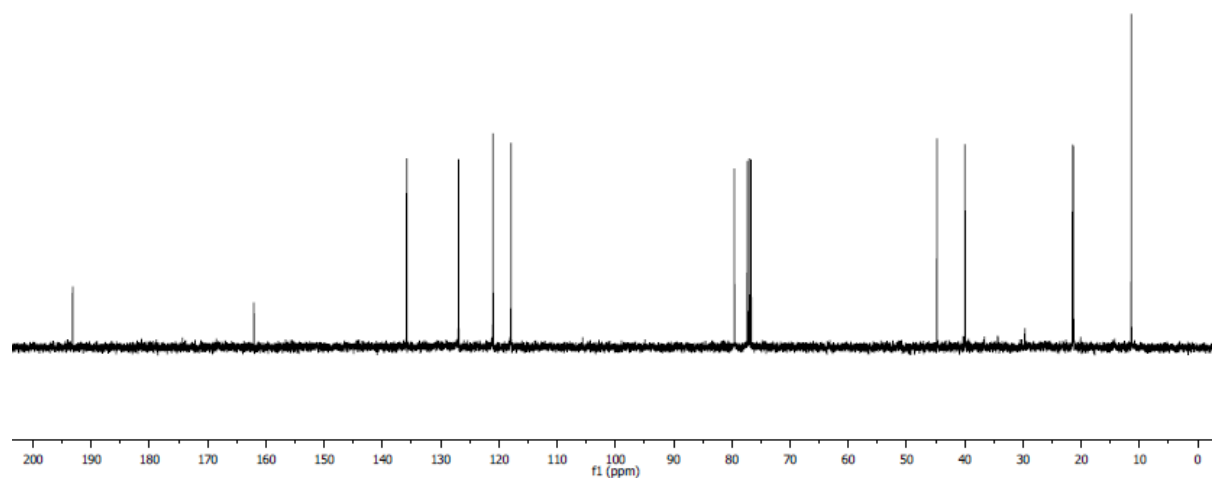

**(S)-2-cyclopentylchroman-4-one**

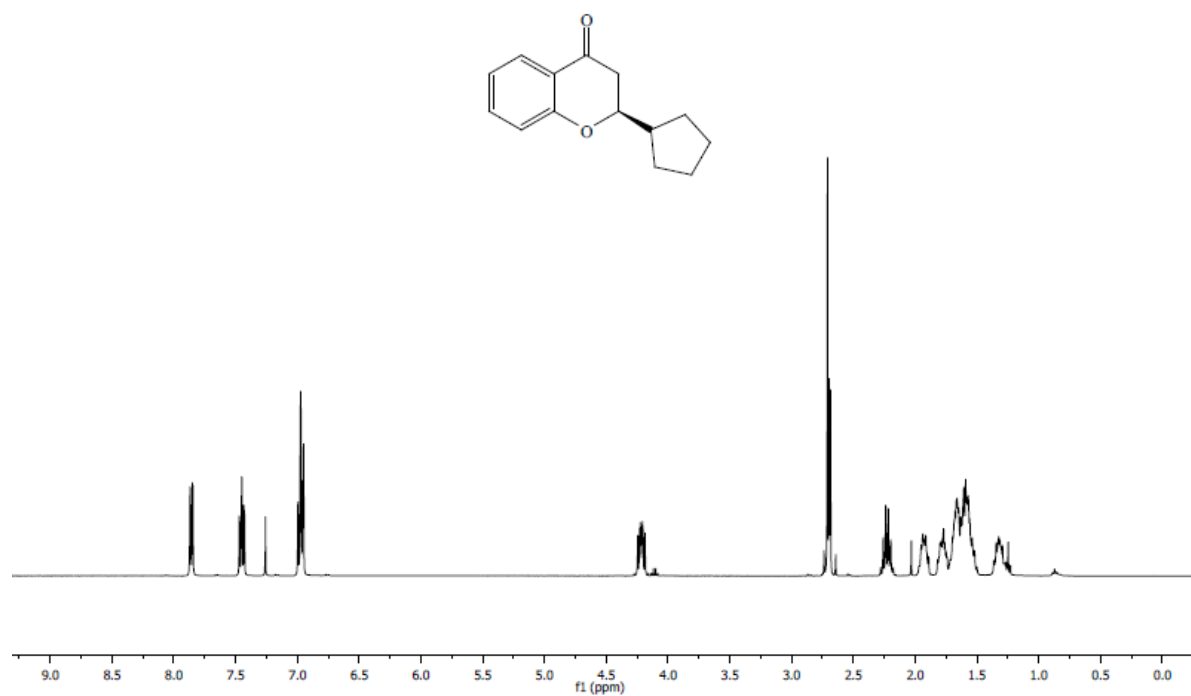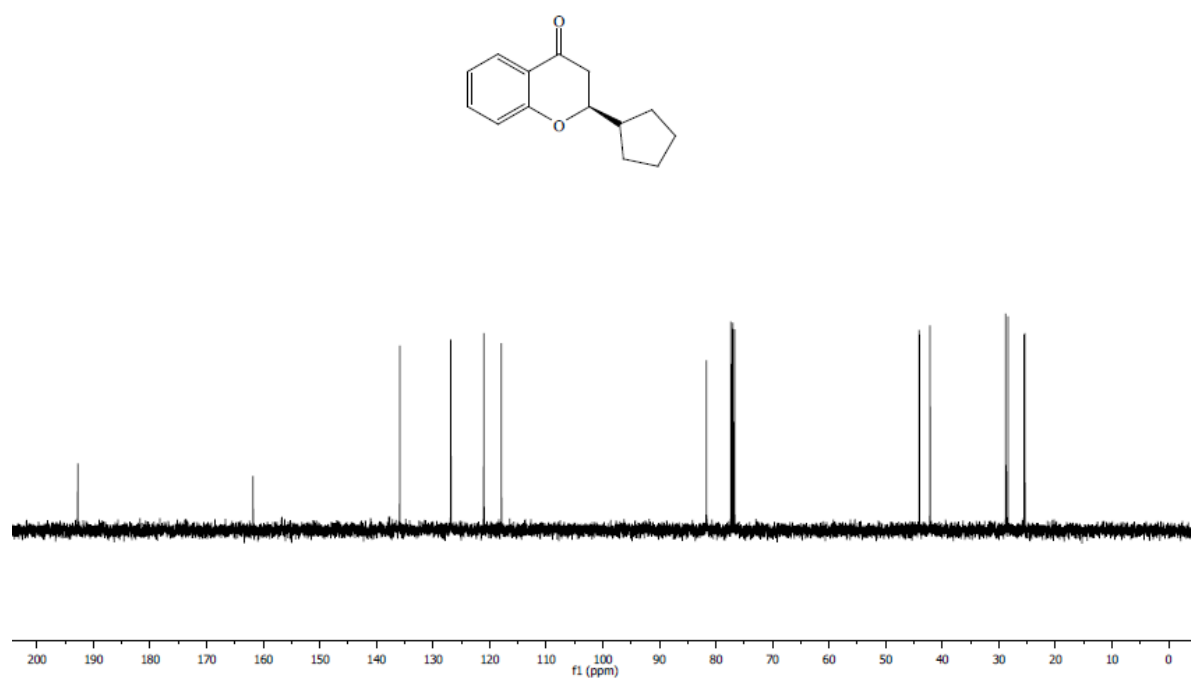

**(*R*)-2-ethyl-6-methylchroman-4-one**

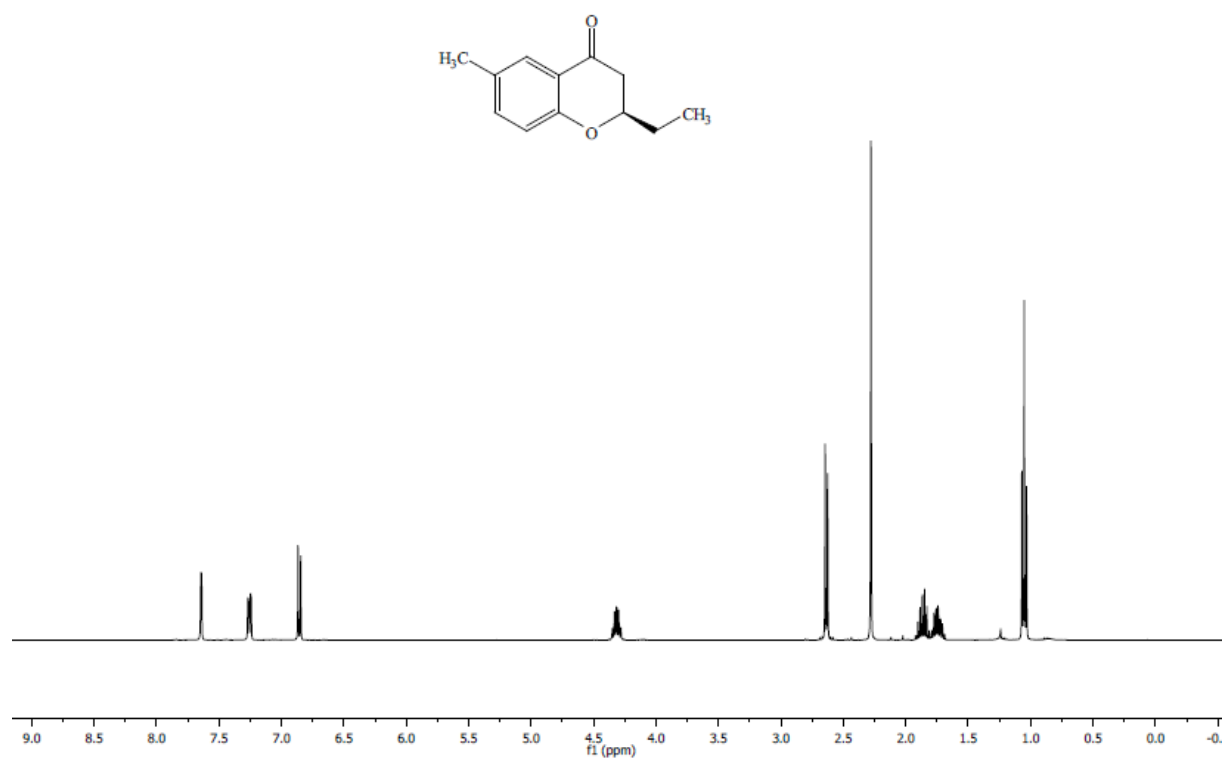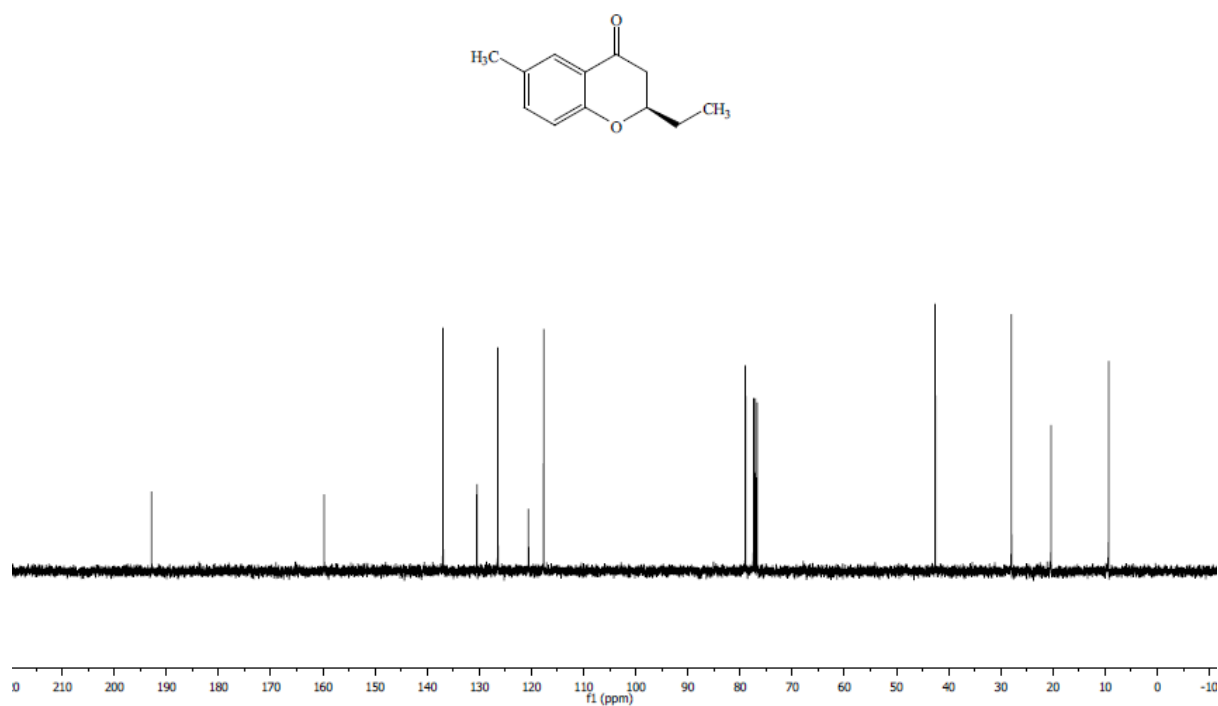

**(*R*)-2-ethyl-6-fluorochroman-4-one**

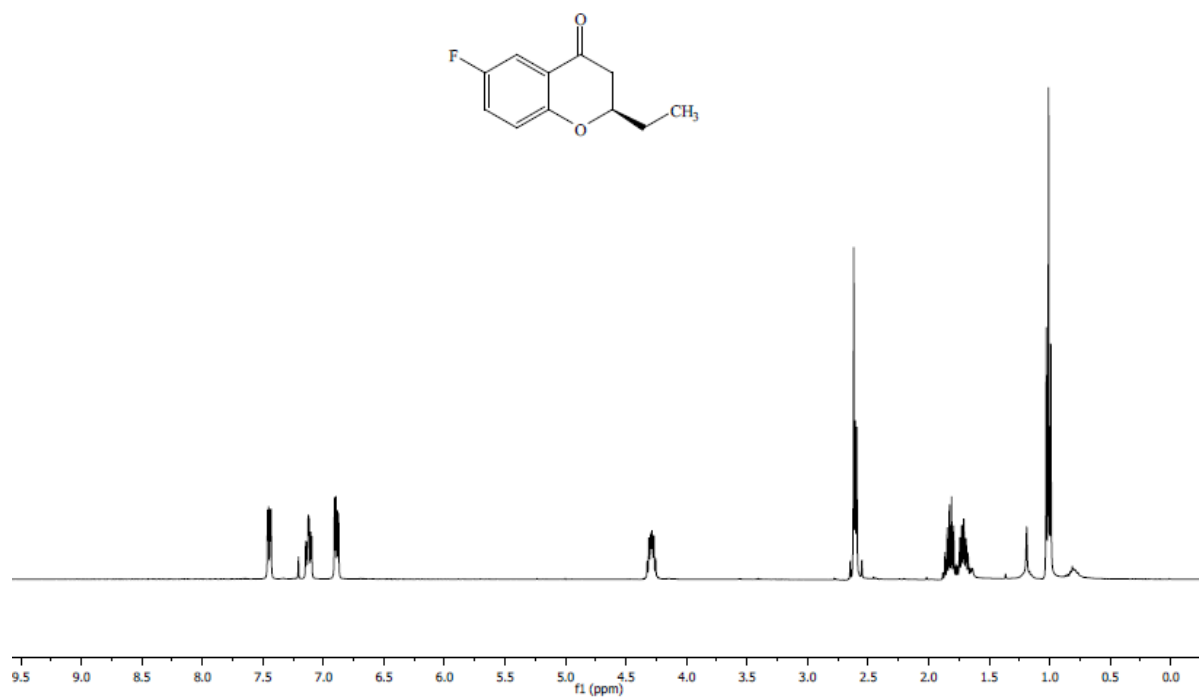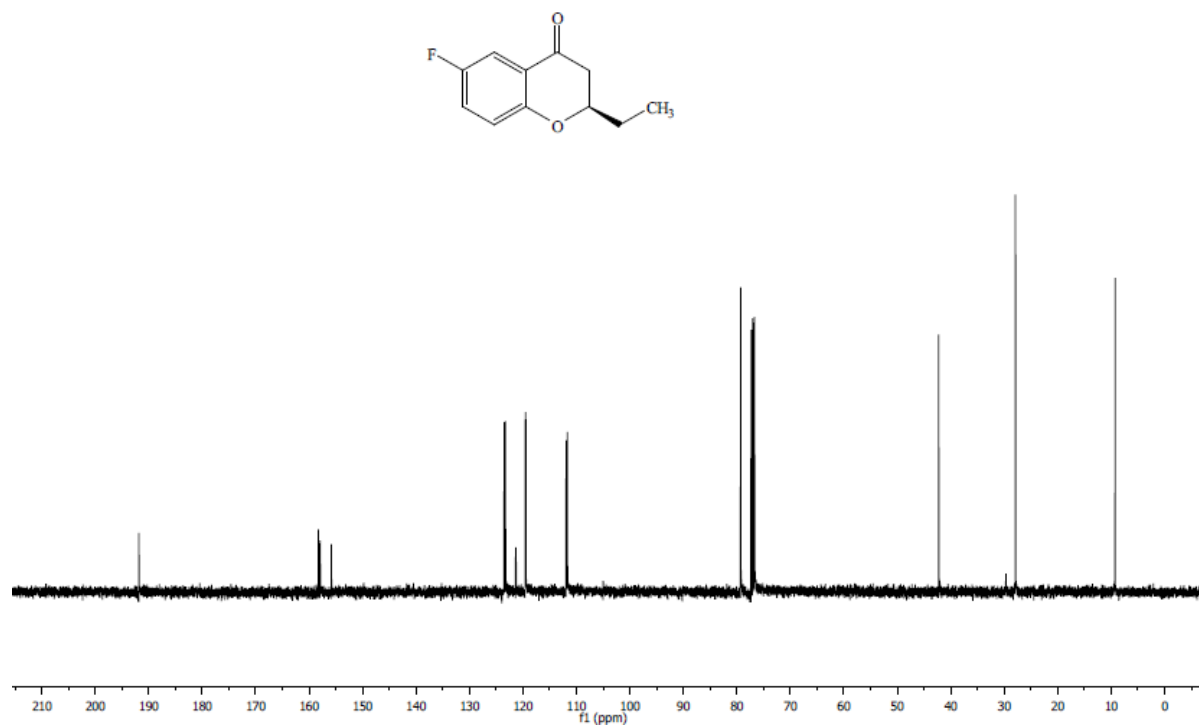

**(*R*)-6-chloro-2-ethylchroman-4-one**

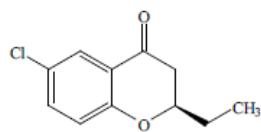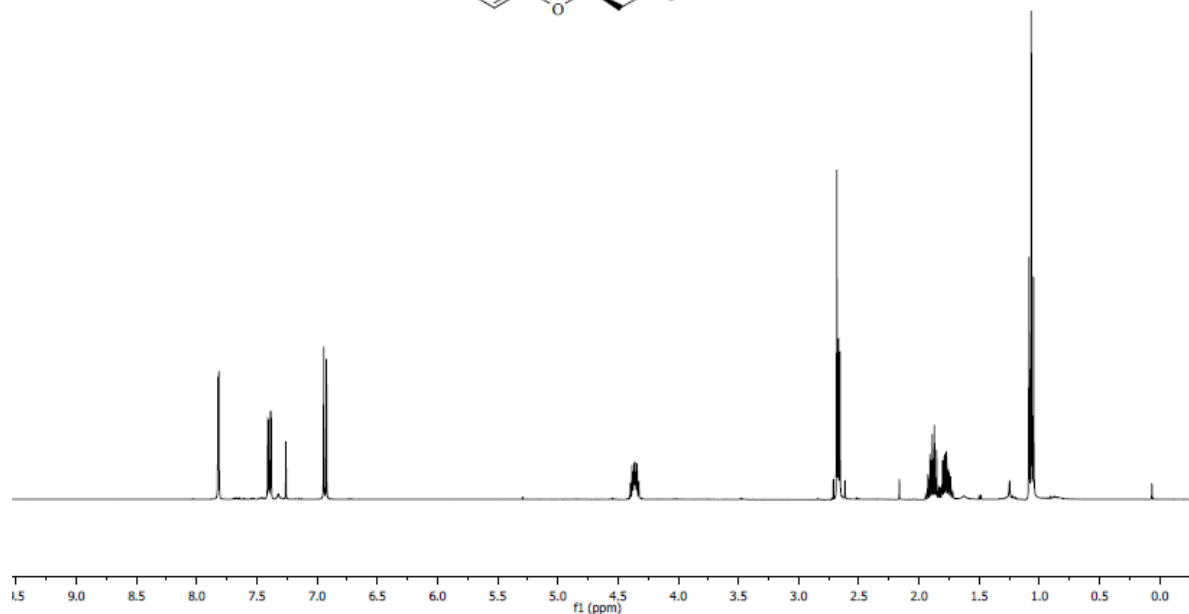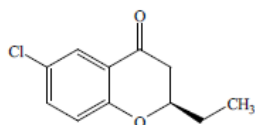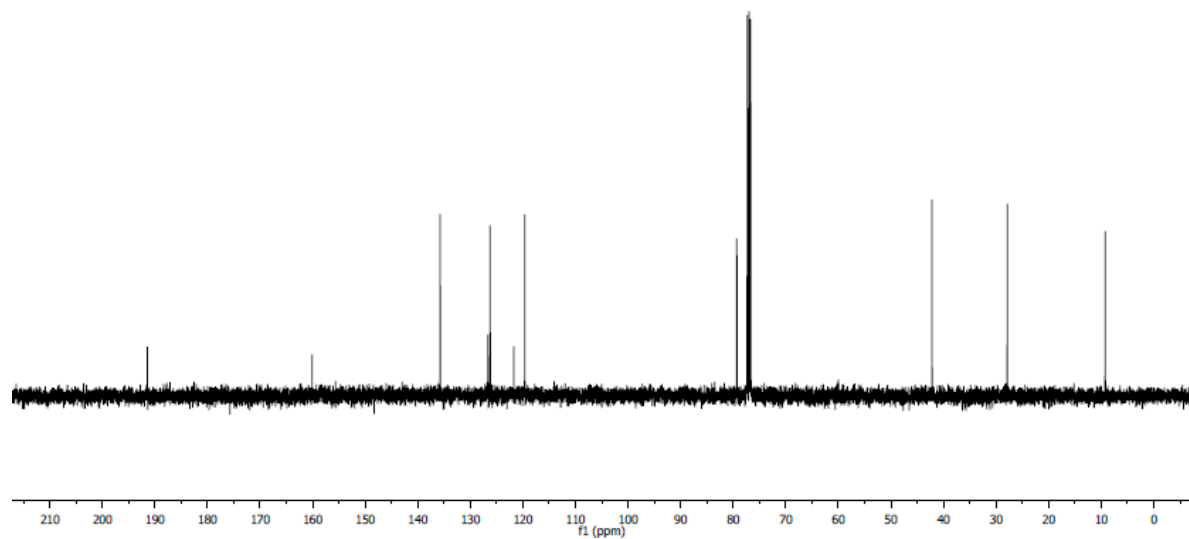

**(R)-6-bromo-2-ethylchroman-4-one**

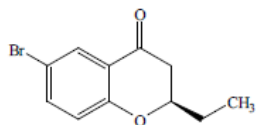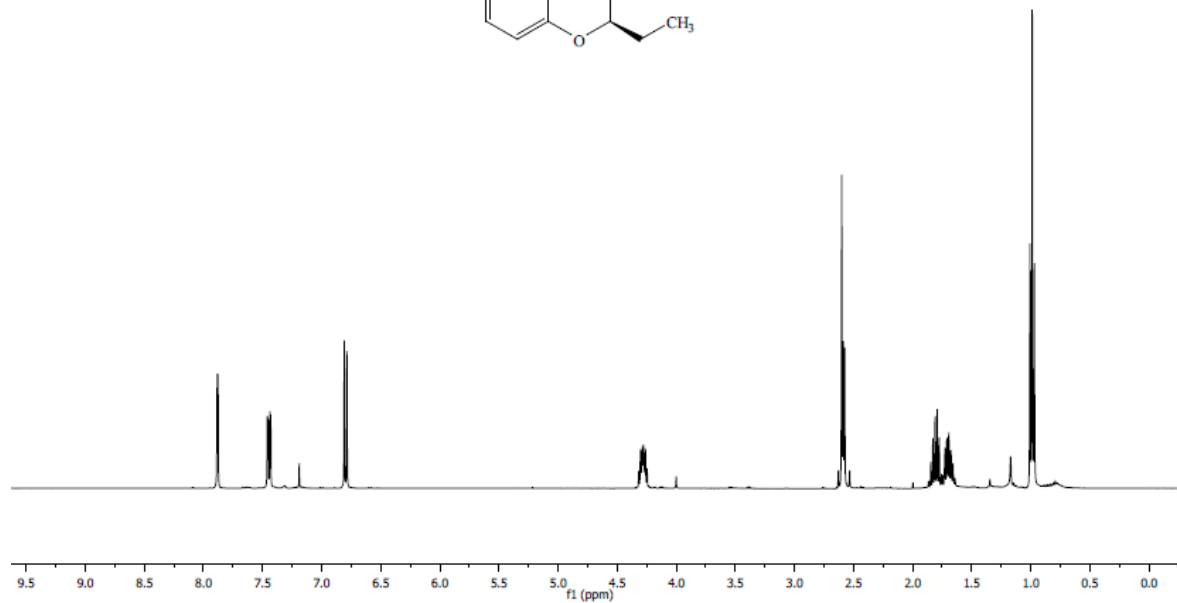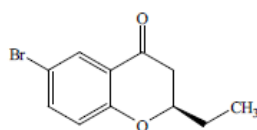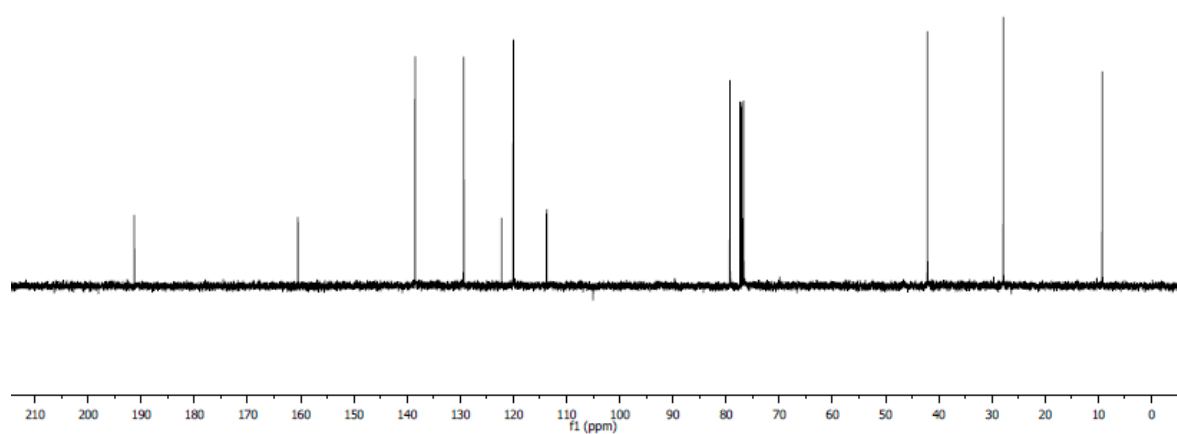

**(*R*)-2-ethyl-7-methoxychroman-4-one**

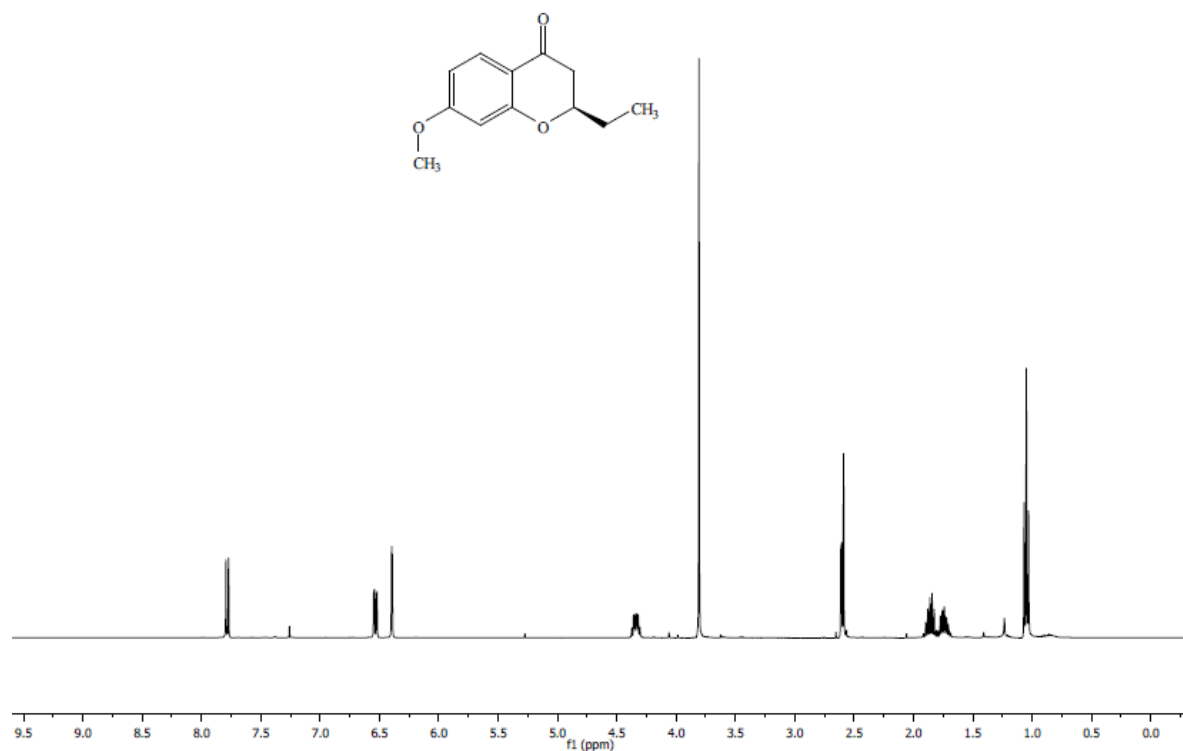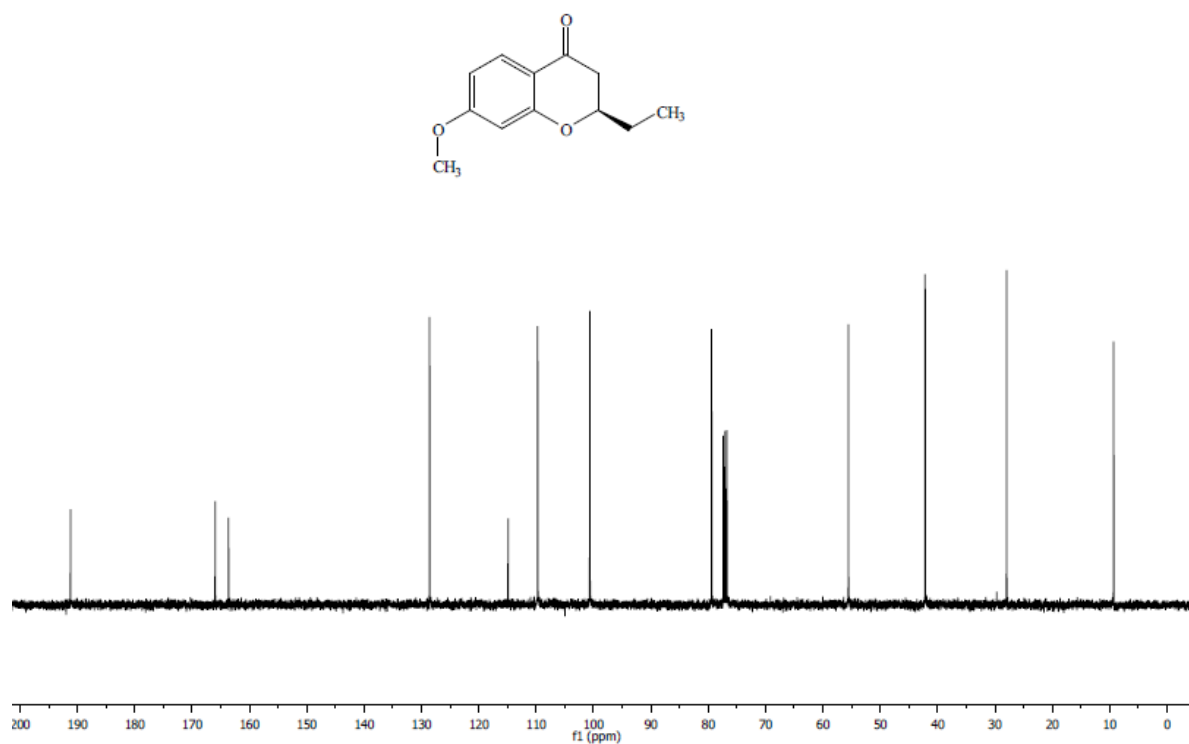



**(2*R*,3*R*)-2-ethyl-3-(hydroxy(phenyl)methyl)chroman-4-one**

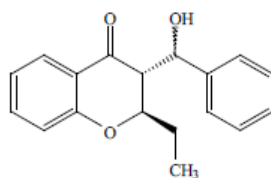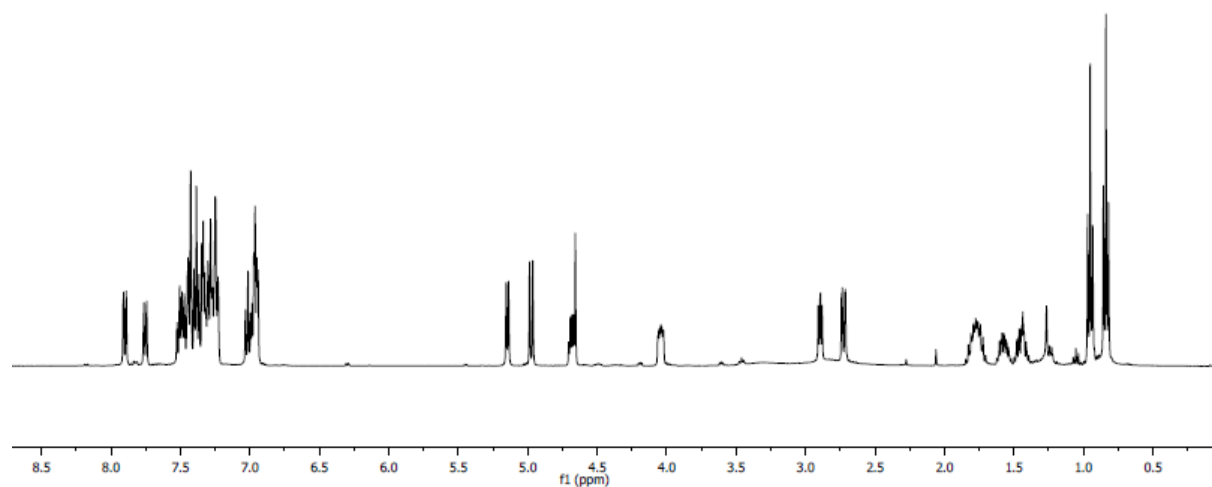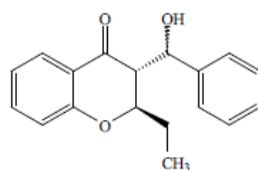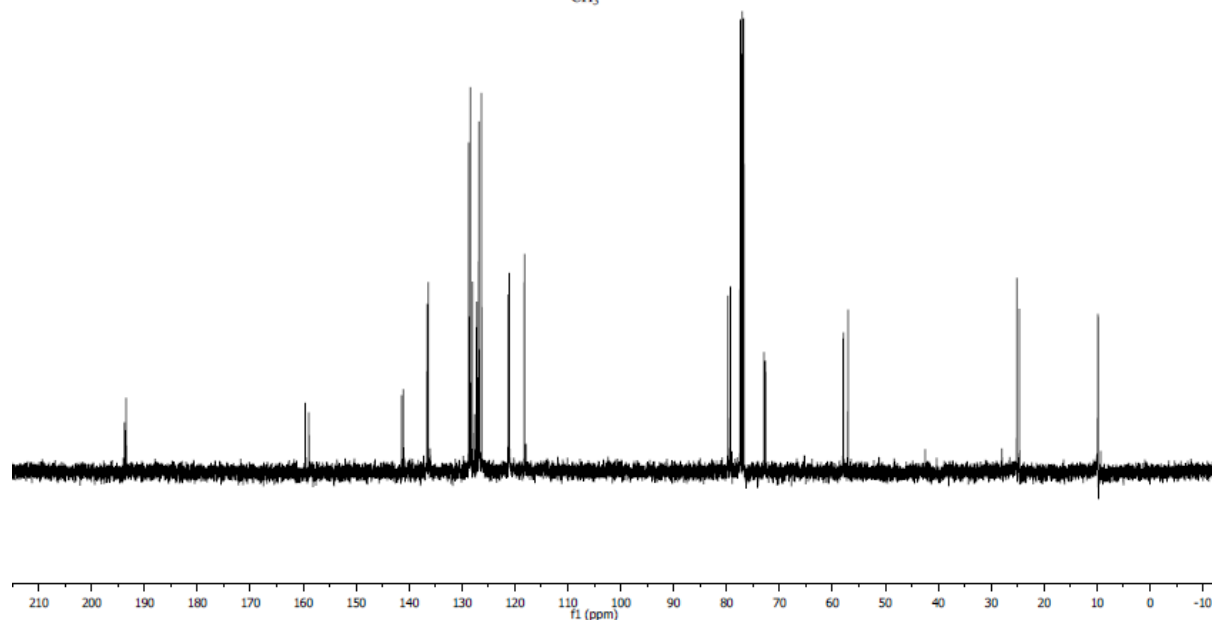

**(*R*)-4-ethyl-3,4-dihydro-2H-benzo[*b*][1,4]dioxepin-2-one**

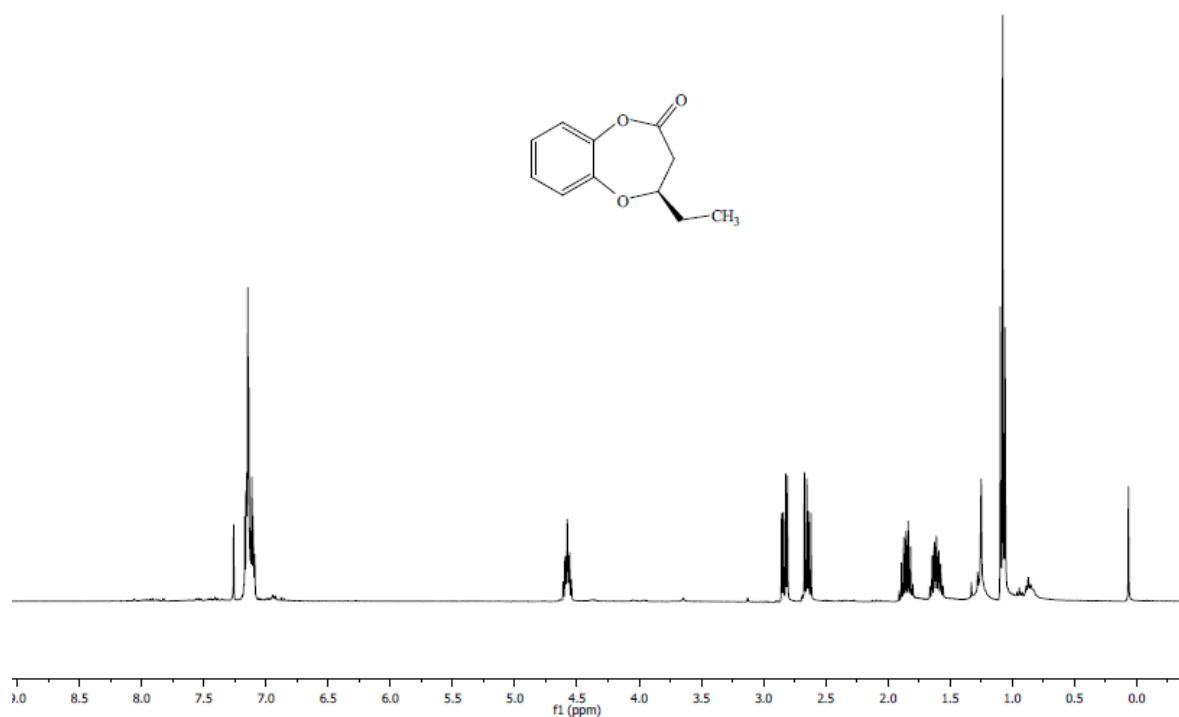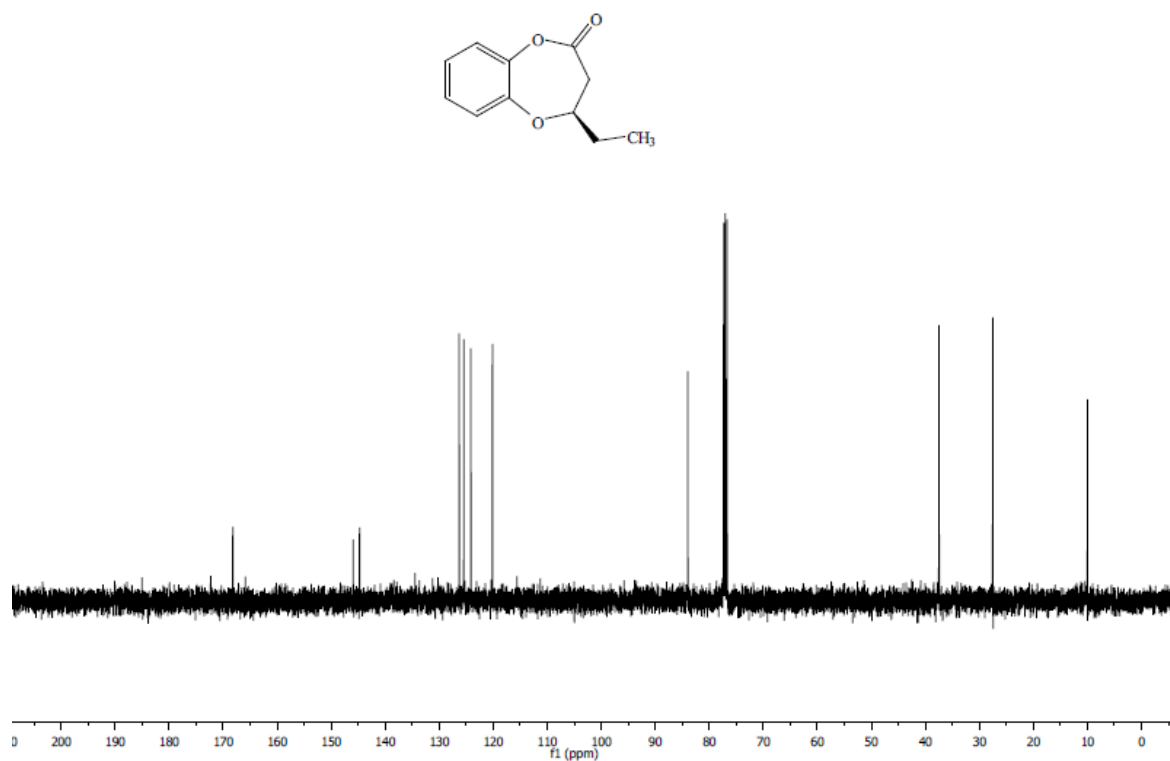

## HPLC data of the compounds

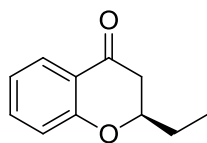

### <Chromatogram>

mAU

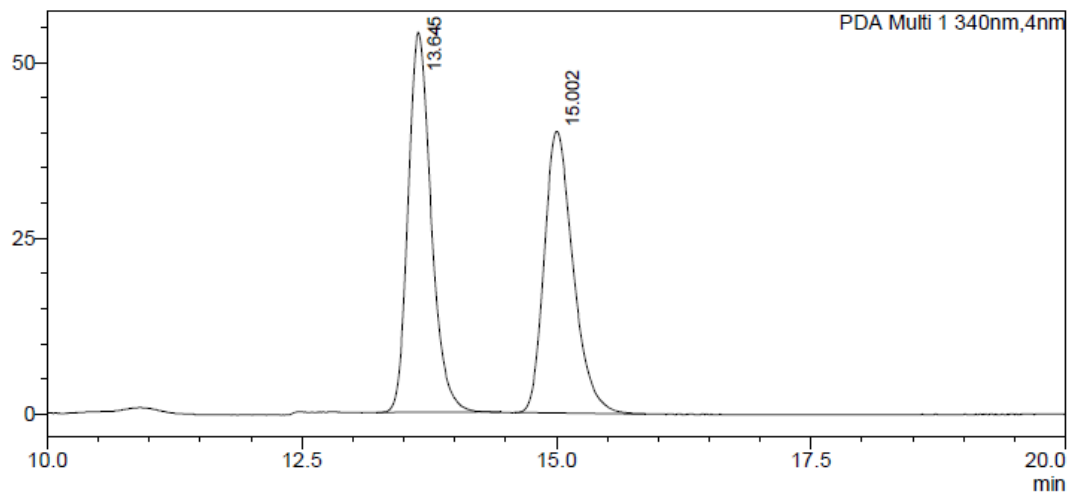

### <Peak Table>

PDA Ch1 340nm

| Peak# | Ret. Time | Area    | Height | Conc. | Unit | Area%   |
|-------|-----------|---------|--------|-------|------|---------|
| 1     | 13.645    | 851567  | 54031  | 0.000 |      | 51.821  |
| 2     | 15.002    | 791717  | 40031  | 0.000 |      | 48.179  |
| Total |           | 1643284 | 94062  |       |      | 100.000 |

### <Chromatogram>

mAU

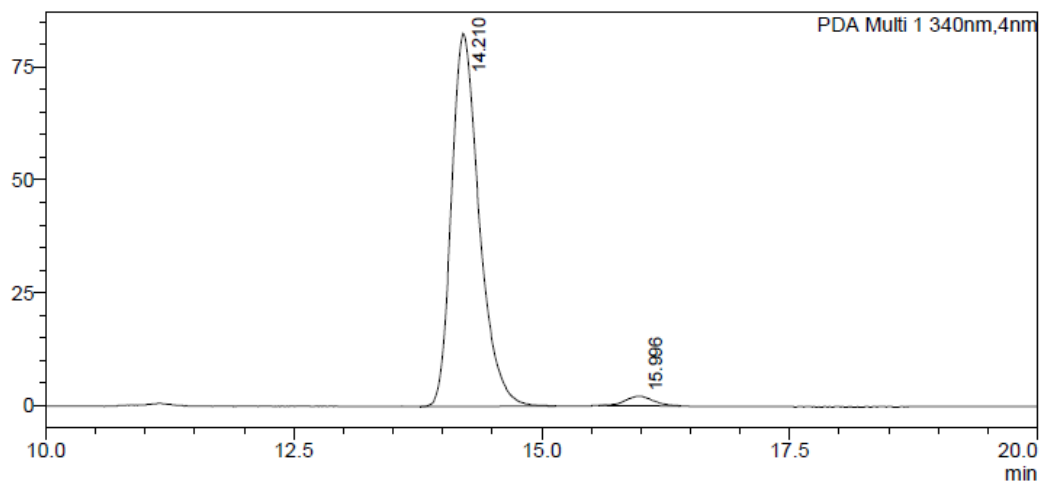

### <Peak Table>

PDA Ch1 340nm

| Peak# | Ret. Time | Area    | Height | Conc. | Unit | Area%   |
|-------|-----------|---------|--------|-------|------|---------|
| 1     | 14.210    | 1603072 | 82510  | 0.000 |      | 97.562  |
| 2     | 15.996    | 40052   | 2089   | 0.000 |      | 2.438   |
| Total |           | 1643124 | 84599  |       |      | 100.000 |

UV Spectrum

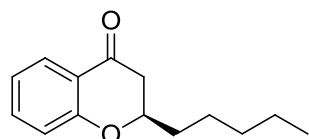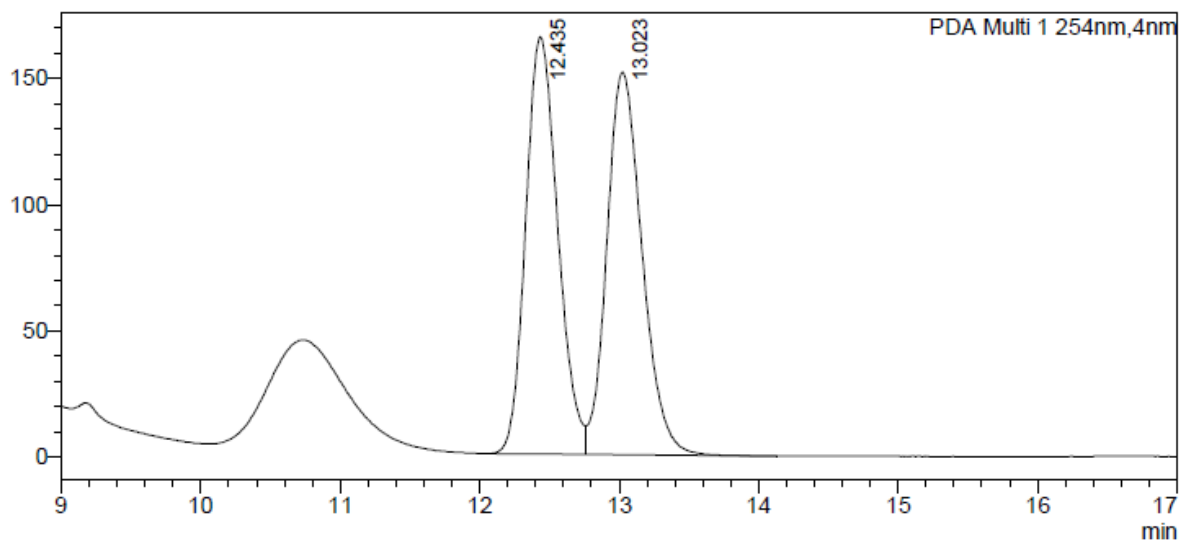

<Peak Table>

PDA Ch1 254nm

| Peak# | Ret. Time | Area    | Height | Conc. | Unit | Area%   |
|-------|-----------|---------|--------|-------|------|---------|
| 1     | 12.435    | 2653644 | 165283 | 0.000 |      | 49.840  |
| 2     | 13.023    | 2670653 | 151722 | 0.000 |      | 50.160  |
| Total |           | 5324297 | 317005 |       |      | 100.000 |

<Chromatogram>

mAU

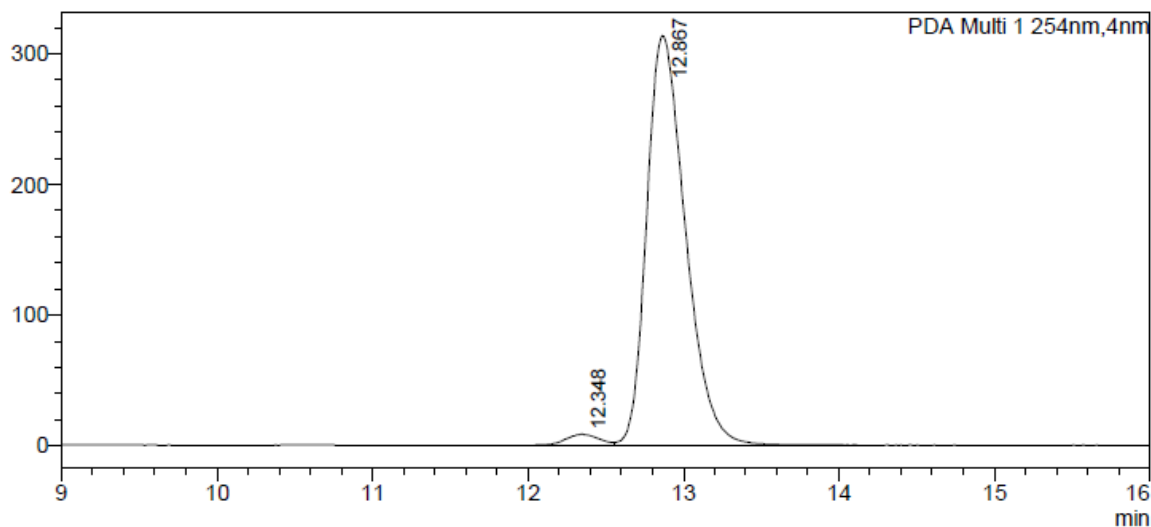

<Peak Table>

PDA Ch1 254nm

| Peak# | Ret. Time | Area    | Height | Conc. | Unit | Area%   |
|-------|-----------|---------|--------|-------|------|---------|
| 1     | 12.348    | 126546  | 8407   | 0.000 |      | 2.271   |
| 2     | 12.867    | 5446001 | 313573 | 0.000 |      | 97.729  |
| Total |           | 5572547 | 321980 |       |      | 100.000 |

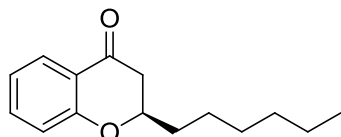

### <Chromatogram>

mAU

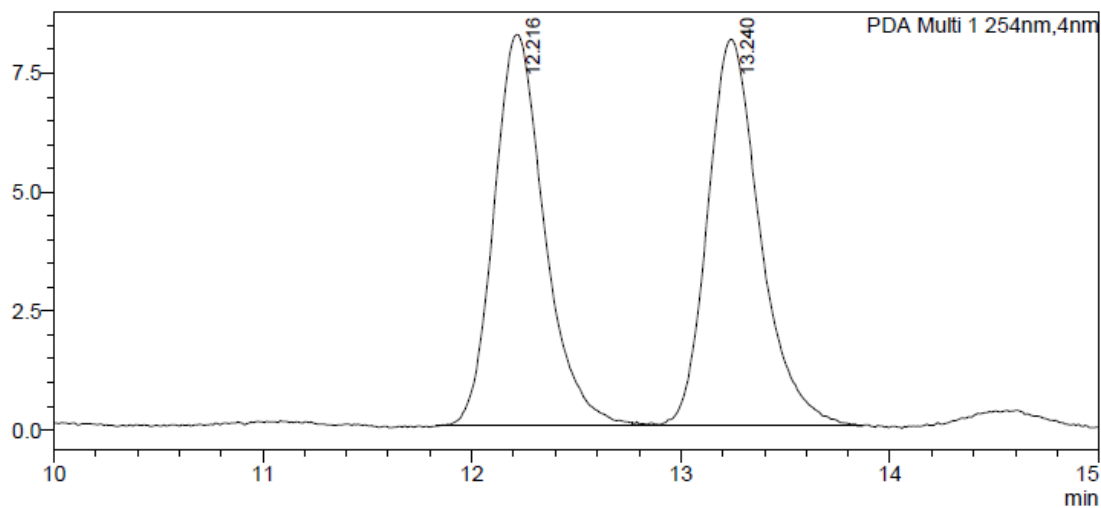

### <Peak Table>

PDA Ch1 254nm

| Peak# | Ret. Time | Area   | Height | Conc. | Unit | Area%   |
|-------|-----------|--------|--------|-------|------|---------|
| 1     | 12.216    | 138569 | 8225   | 0.000 |      | 49.350  |
| 2     | 13.240    | 142217 | 8131   | 0.000 |      | 50.650  |
| Total |           | 280786 | 16357  |       |      | 100.000 |

### <Chromatogram>

mAU

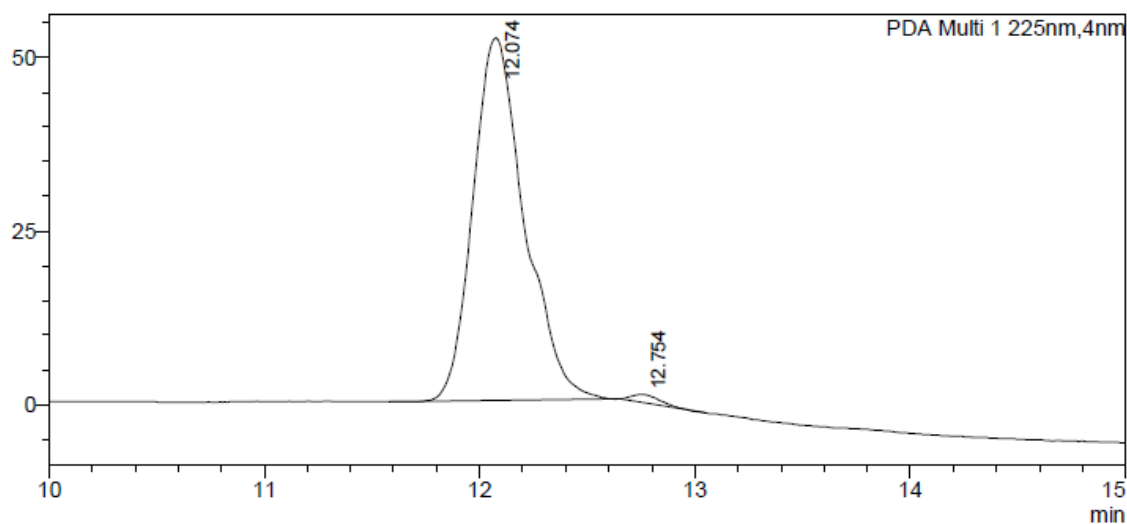

### <Peak Table>

PDA Ch1 225nm

| Peak# | Ret. Time | Area   | Height | Conc. | Unit | Area%   |
|-------|-----------|--------|--------|-------|------|---------|
| 1     | 12.074    | 868951 | 52237  | 0.000 |      | 98.871  |
| 2     | 12.754    | 9925   | 1154   | 0.000 |      | 1.129   |
| Total |           | 878876 | 53391  |       |      | 100.000 |

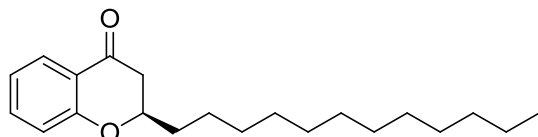

**<Chromatogram>**

mAU

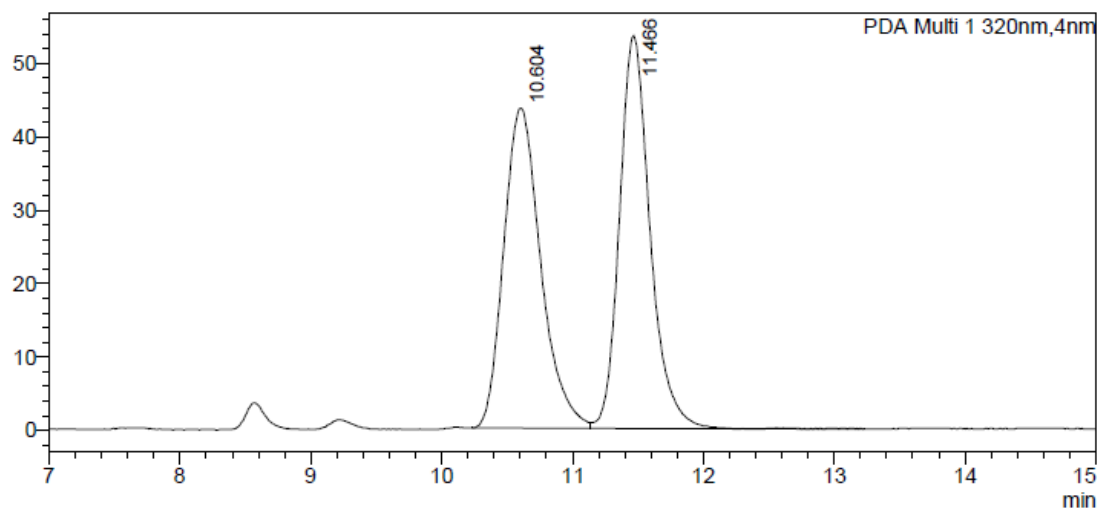

**<Peak Table>**

PDA Ch1 320nm

| Peak# | Ret. Time | Area    | Height | Conc. | Unit | Area%   |
|-------|-----------|---------|--------|-------|------|---------|
| 1     | 10.604    | 858504  | 43615  | 0.000 |      | 49.665  |
| 2     | 11.466    | 870074  | 53516  | 0.000 |      | 50.335  |
| Total |           | 1728578 | 97131  |       |      | 100.000 |

**<Chromatogram>**

mAU

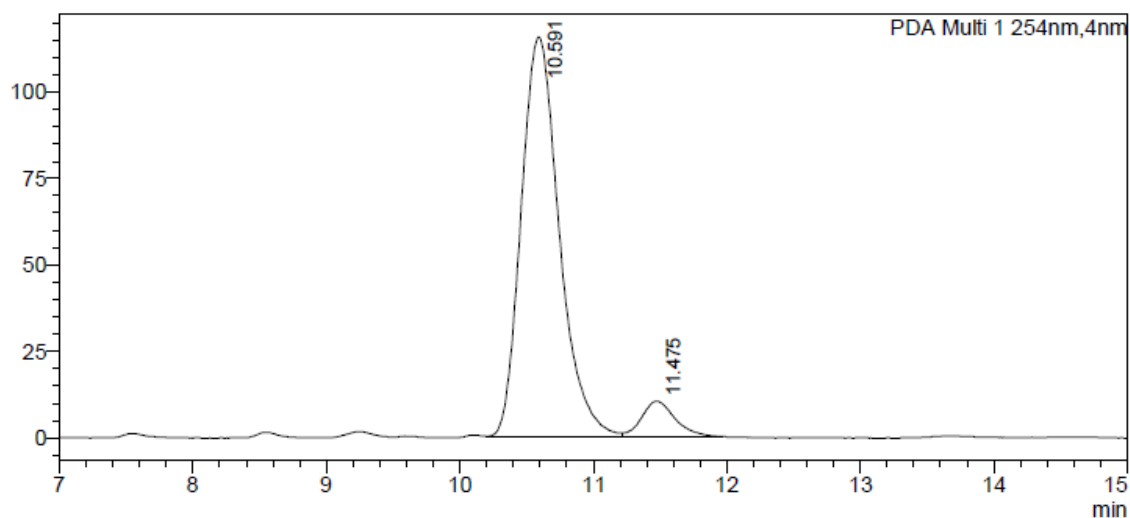

**<Peak Table>**

PDA Ch1 254nm

| Peak# | Ret. Time | Area    | Height | Conc. | Unit | Area%   |
|-------|-----------|---------|--------|-------|------|---------|
| 1     | 10.591    | 2288582 | 115504 | 0.000 |      | 92.783  |
| 2     | 11.475    | 178020  | 10274  | 0.000 |      | 7.217   |
| Total |           | 2466601 | 125778 |       |      | 100.000 |

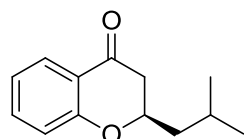

<Chromatogram>

mAU

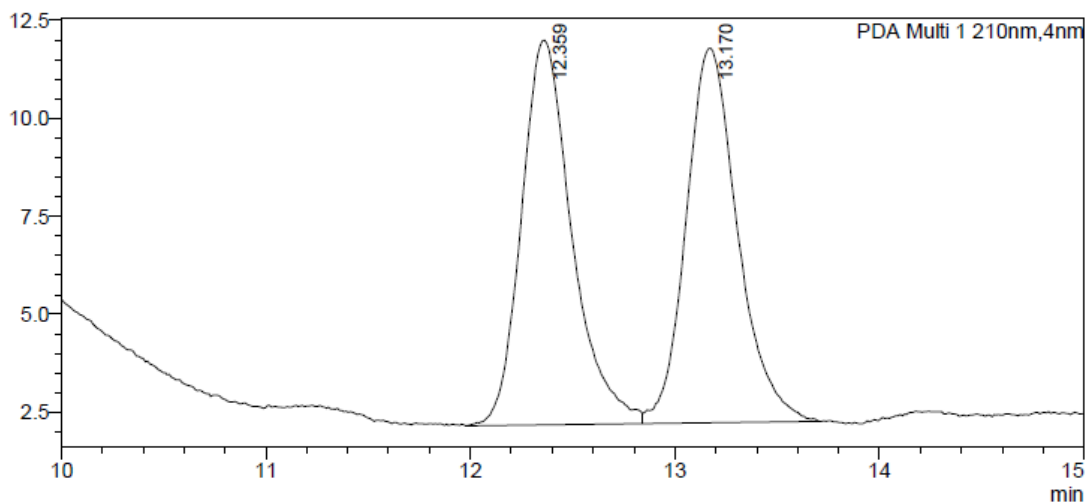

<Peak Table>

PDA Ch1 210nm

| Peak# | Ret. Time | Area   | Height | Conc. | Unit | Area%   |
|-------|-----------|--------|--------|-------|------|---------|
| 1     | 12.359    | 168442 | 9813   | 0.000 |      | 50.141  |
| 2     | 13.170    | 167495 | 9563   | 0.000 |      | 49.859  |
| Total |           | 335937 | 19376  |       |      | 100.000 |

<Chromatogram>

mAU

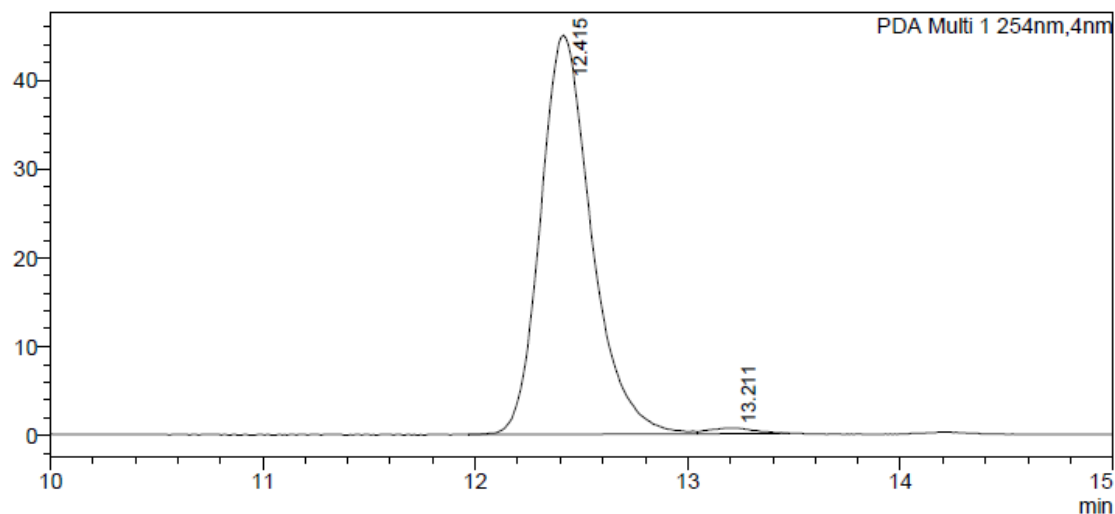

<Peak Table>

PDA Ch1 254nm

| Peak# | Ret. Time | Area   | Height | Conc. | Unit | Area%   |
|-------|-----------|--------|--------|-------|------|---------|
| 1     | 12.415    | 750569 | 44950  | 0.000 |      | 98.790  |
| 2     | 13.211    | 9192   | 632    | 0.000 |      | 1.210   |
| Total |           | 759761 | 45582  |       |      | 100.000 |

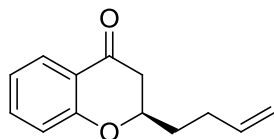

### <Chromatogram>

mAU

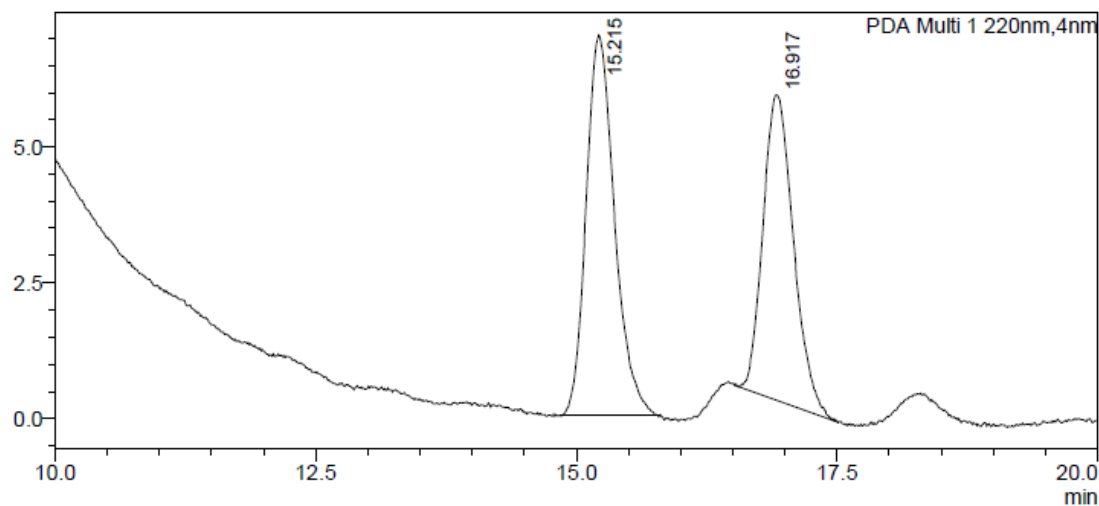

### <Peak Table>

PDA Ch1 220nm

| Peak# | Ret. Time | Area   | Height | Conc. | Unit | Area%   |
|-------|-----------|--------|--------|-------|------|---------|
| 1     | 15.215    | 132949 | 6997   | 0.000 |      | 53.767  |
| 2     | 16.917    | 114322 | 5615   | 0.000 |      | 46.233  |
| Total |           | 247271 | 12612  |       |      | 100.000 |

### <Chromatogram>

mAU

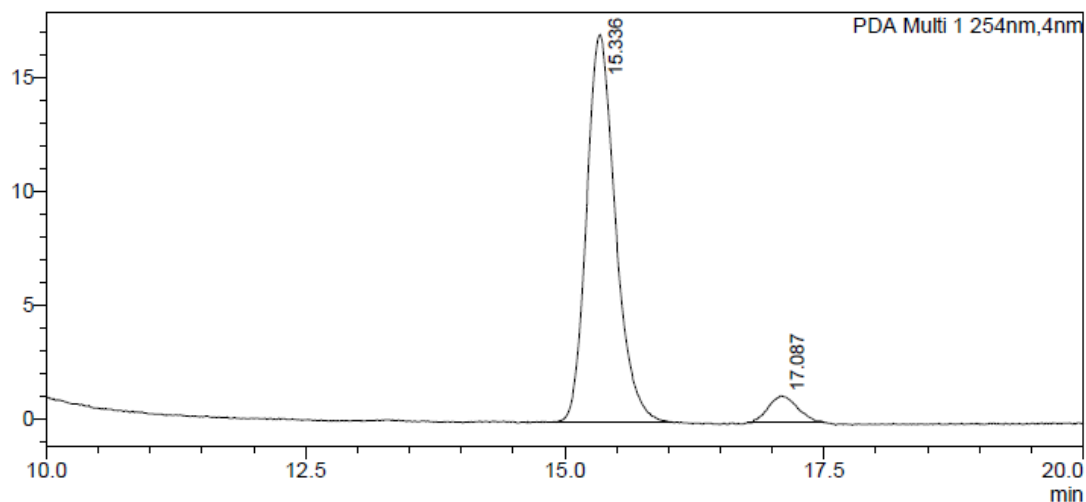

### <Peak Table>

PDA Ch1 254nm

| Peak# | Ret. Time | Area   | Height | Conc. | Unit | Area%   |
|-------|-----------|--------|--------|-------|------|---------|
| 1     | 15.336    | 330494 | 17034  | 0.000 |      | 93.699  |
| 2     | 17.087    | 22226  | 1160   | 0.000 |      | 6.301   |
| Total |           | 352720 | 18195  |       |      | 100.000 |



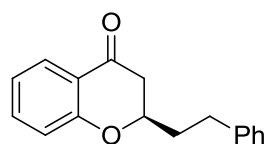

**<Chromatogram>**

mAU

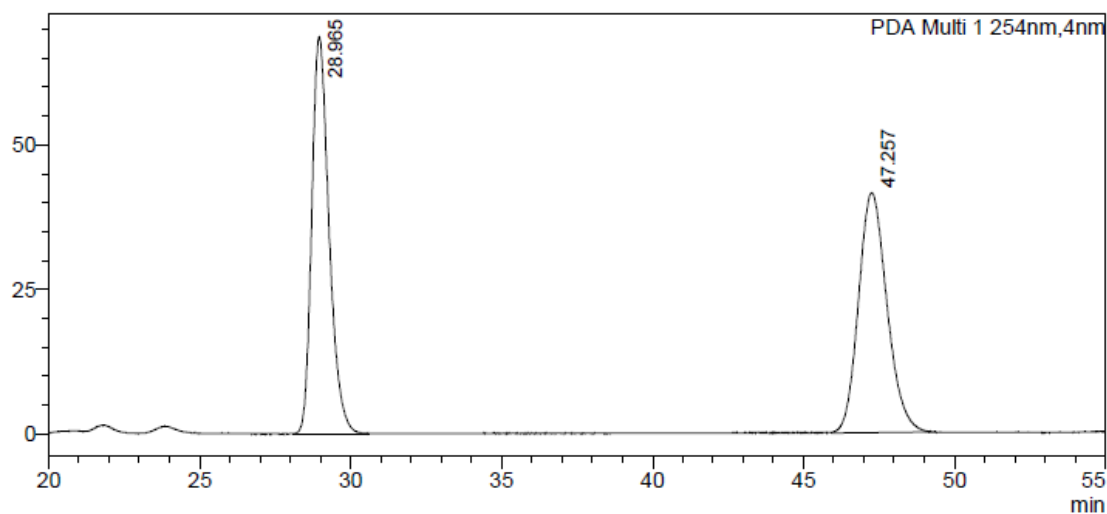

**<Peak Table>**

PDA Ch1 254nm

| Peak# | Ret. Time | Area    | Height | Conc. | Unit | Area%   |
|-------|-----------|---------|--------|-------|------|---------|
| 1     | 28.965    | 2731946 | 68724  | 0.000 |      | 50.055  |
| 2     | 47.257    | 2725920 | 41516  | 0.000 |      | 49.945  |
| Total |           | 5457866 | 110239 |       |      | 100.000 |

**<Chromatogram>**

mAU

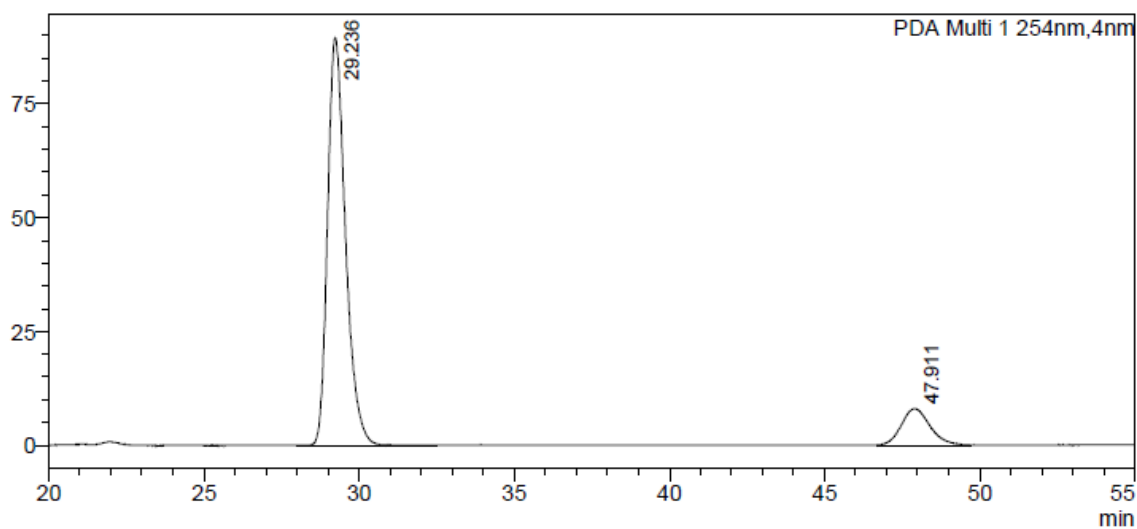

**<Peak Table>**

PDA Ch1 254nm

| Peak# | Ret. Time | Area    | Height | Conc. | Unit | Area%   |
|-------|-----------|---------|--------|-------|------|---------|
| 1     | 29.236    | 3593665 | 89448  | 0.000 |      | 87.532  |
| 2     | 47.911    | 511873  | 7987   | 0.000 |      | 12.468  |
| Total |           | 4105538 | 97434  |       |      | 100.000 |

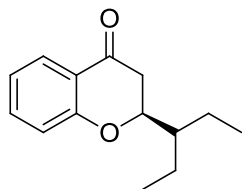

### <Chromatogram>

mAU

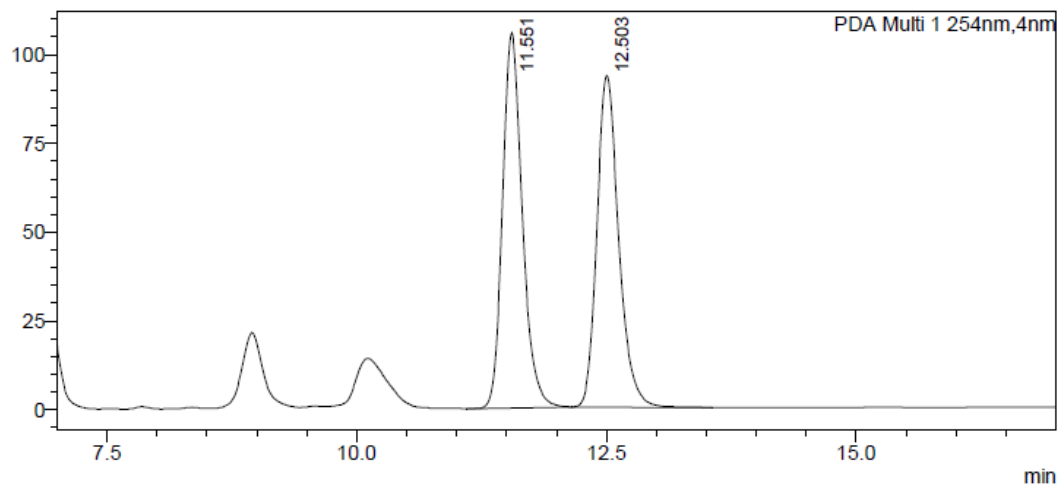

### <Peak Table>

PDA Ch1 254nm

| Peak# | Ret. Time | Area    | Height | Conc. | Unit | Area%   |
|-------|-----------|---------|--------|-------|------|---------|
| 1     | 11.551    | 1453356 | 105572 | 0.000 |      | 50.662  |
| 2     | 12.503    | 1415357 | 93426  | 0.000 |      | 49.338  |
| Total |           | 2868713 | 198998 |       |      | 100.000 |

### <Chromatogram>

mAU

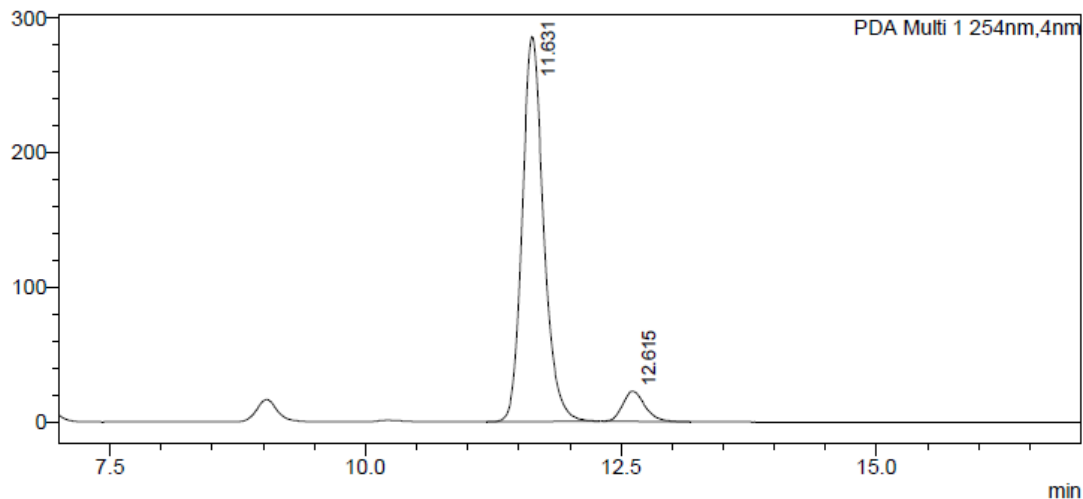

### <Peak Table>

PDA Ch1 254nm

| Peak# | Ret. Time | Area    | Height | Conc. | Unit | Area%   |
|-------|-----------|---------|--------|-------|------|---------|
| 1     | 11.631    | 4158195 | 285571 | 0.000 |      | 92.412  |
| 2     | 12.615    | 341420  | 22514  | 0.000 |      | 7.588   |
| Total |           | 4499615 | 308085 |       |      | 100.000 |

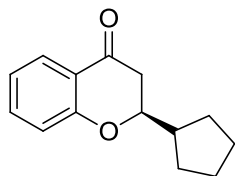

### <Chromatogram>

mAU

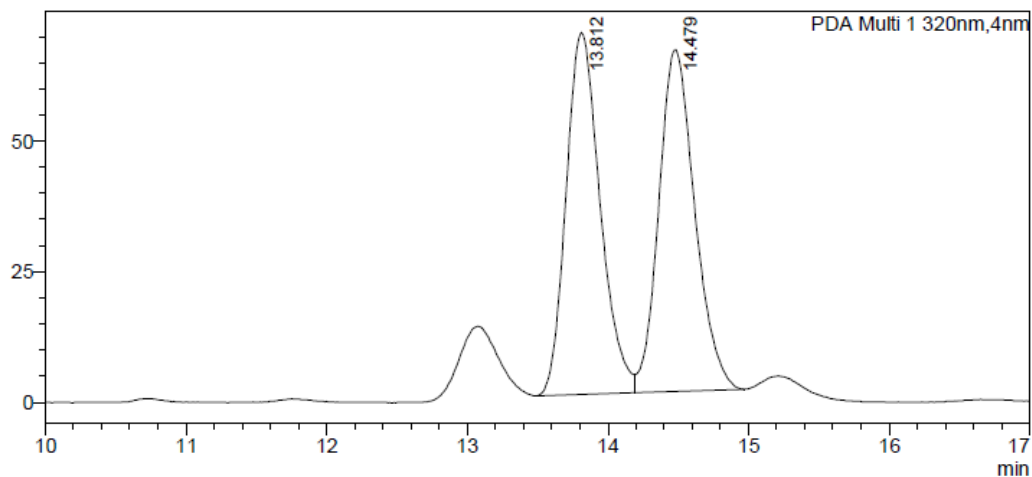

### <Peak Table>

PDA Ch1 320nm

| Peak# | Ret. Time | Area    | Height | Conc. | Unit | Area%   |
|-------|-----------|---------|--------|-------|------|---------|
| 1     | 13.812    | 1167909 | 69298  | 0.000 |      | 50.059  |
| 2     | 14.479    | 1165158 | 65435  | 0.000 |      | 49.941  |
| Total |           | 2333067 | 134733 |       |      | 100.000 |

### <Chromatogram>

mAU

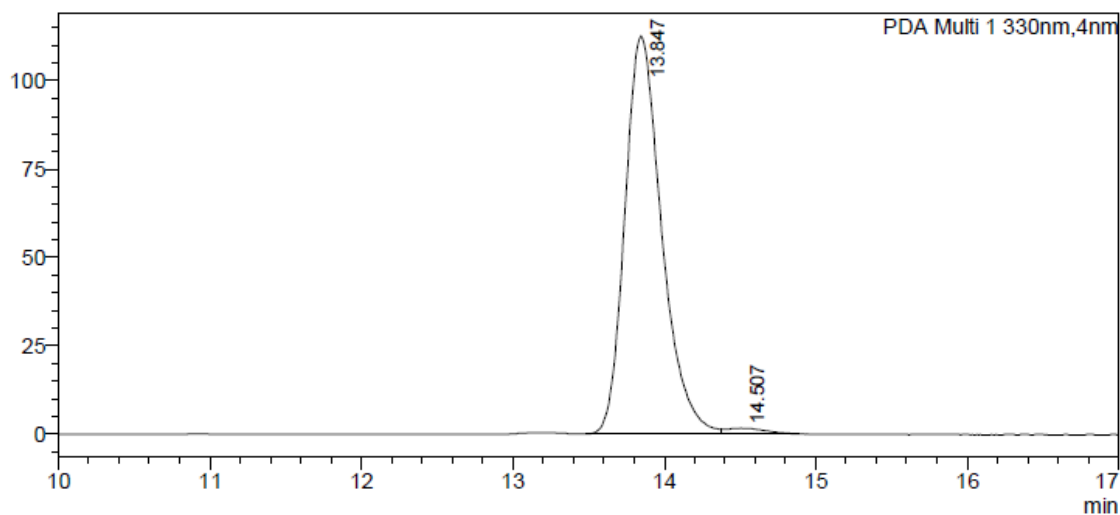

### <Peak Table>

PDA Ch1 330nm

| Peak# | Ret. Time | Area    | Height | Conc. | Unit | Area%   |
|-------|-----------|---------|--------|-------|------|---------|
| 1     | 13.847    | 1906764 | 112610 | 0.000 |      | 98.507  |
| 2     | 14.507    | 28892   | 1612   | 0.000 |      | 1.493   |
| Total |           | 1935655 | 114222 |       |      | 100.000 |

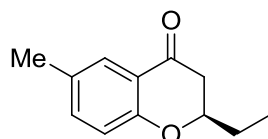

<Chromatogram>

mAU

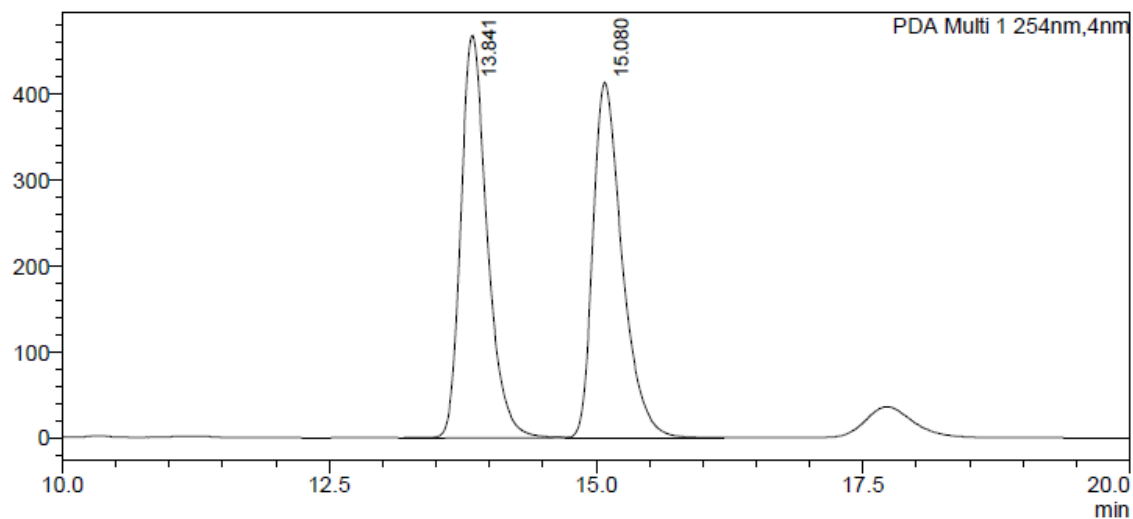

<Peak Table>

PDA Ch1 254nm

| Peak# | Ret. Time | Area     | Height | Conc. | Unit | Area%   |
|-------|-----------|----------|--------|-------|------|---------|
| 1     | 13.841    | 8029057  | 468059 | 0.000 |      | 50.475  |
| 2     | 15.080    | 7877882  | 413953 | 0.000 |      | 49.525  |
| Total |           | 15906939 | 882012 |       |      | 100.000 |

<Chromatogram>

mAU

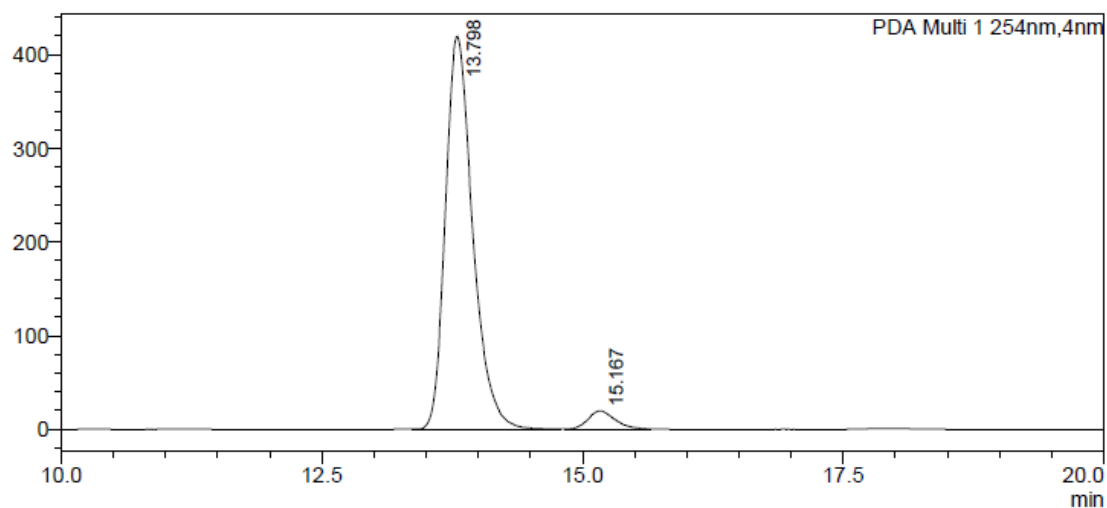

<Peak Table>

PDA Ch1 254nm

| Peak# | Ret. Time | Area    | Height | Conc. | Unit | Area%   |
|-------|-----------|---------|--------|-------|------|---------|
| 1     | 13.798    | 7643157 | 419178 | 0.000 |      | 95.670  |
| 2     | 15.167    | 345888  | 19122  | 0.000 |      | 4.330   |
| Total |           | 7989045 | 438299 |       |      | 100.000 |

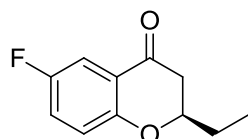

### <Chromatogram>

mAU

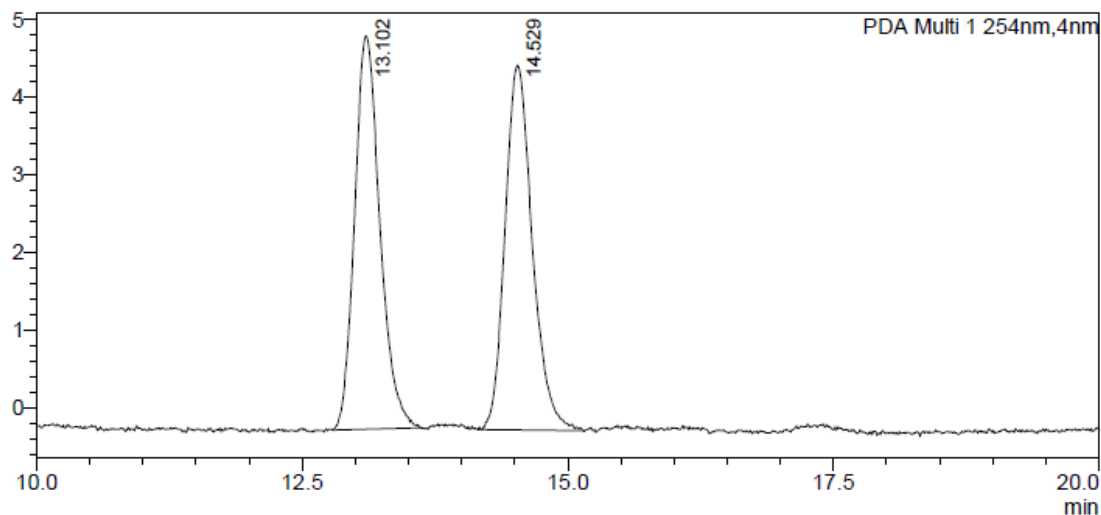

### <Peak Table>

PDA Ch1 254nm

| Peak# | Ret. Time | Area   | Height | Conc. | Unit | Area%   |
|-------|-----------|--------|--------|-------|------|---------|
| 1     | 13.102    | 83865  | 5058   | 0.000 |      | 50.012  |
| 2     | 14.529    | 83823  | 4691   | 0.000 |      | 49.988  |
| Total |           | 167688 | 9749   |       |      | 100.000 |

### <Chromatogram>

mAU

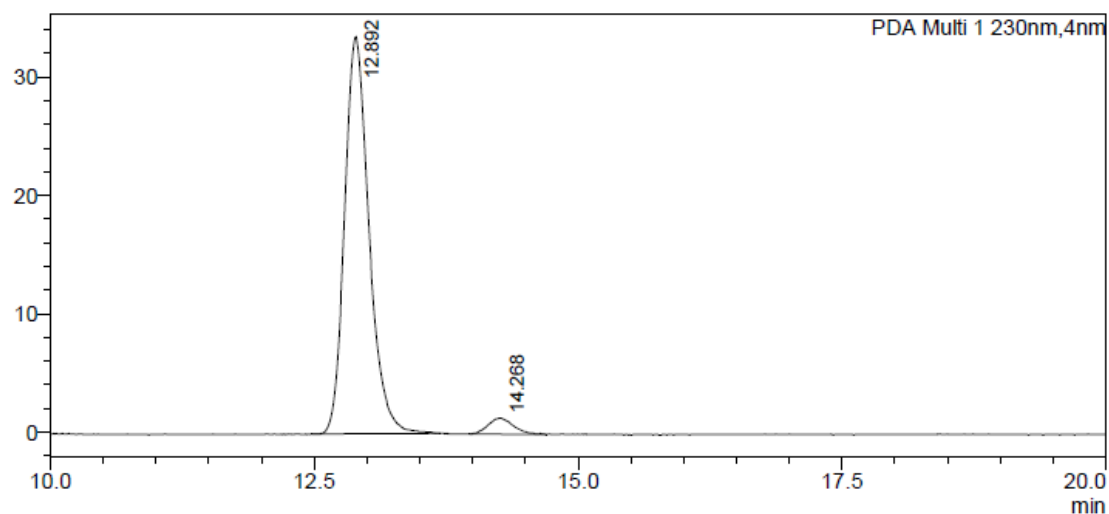

### <Peak Table>

PDA Ch1 230nm

| Peak# | Ret. Time | Area   | Height | Conc. | Unit | Area%   |
|-------|-----------|--------|--------|-------|------|---------|
| 1     | 12.892    | 540517 | 33549  | 0.000 |      | 96.000  |
| 2     | 14.268    | 22524  | 1348   | 0.000 |      | 4.000   |
| Total |           | 563041 | 34898  |       |      | 100.000 |

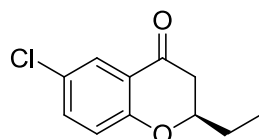

### <Chromatogram>

mAU

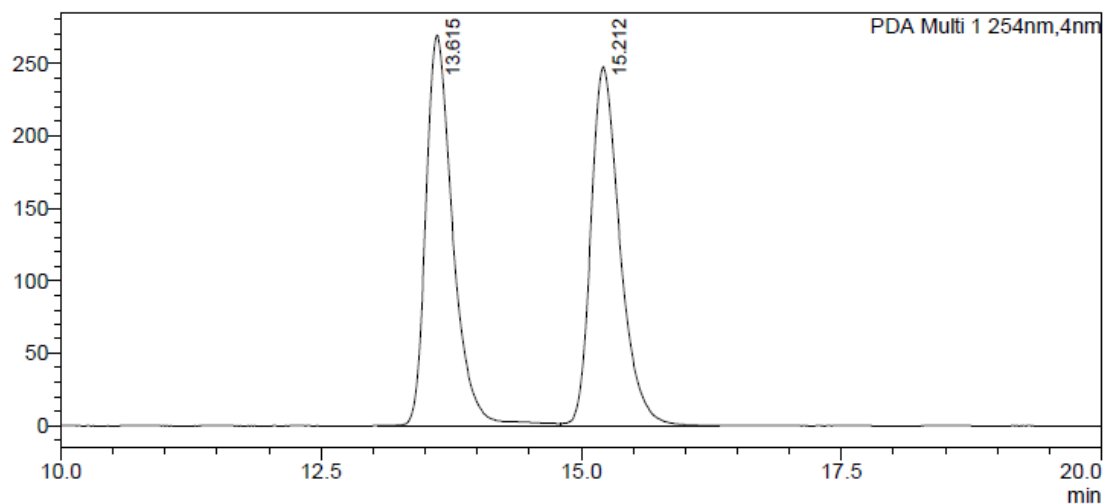

### <Peak Table>

PDA Ch1 254nm

| Peak# | Ret. Time | Area    | Height | Conc. | Unit | Area%   |
|-------|-----------|---------|--------|-------|------|---------|
| 1     | 13.615    | 4863011 | 269364 | 0.000 |      | 50.266  |
| 2     | 15.212    | 4811590 | 247518 | 0.000 |      | 49.734  |
| Total |           | 9674601 | 516882 |       |      | 100.000 |

### <Chromatogram>

mAU

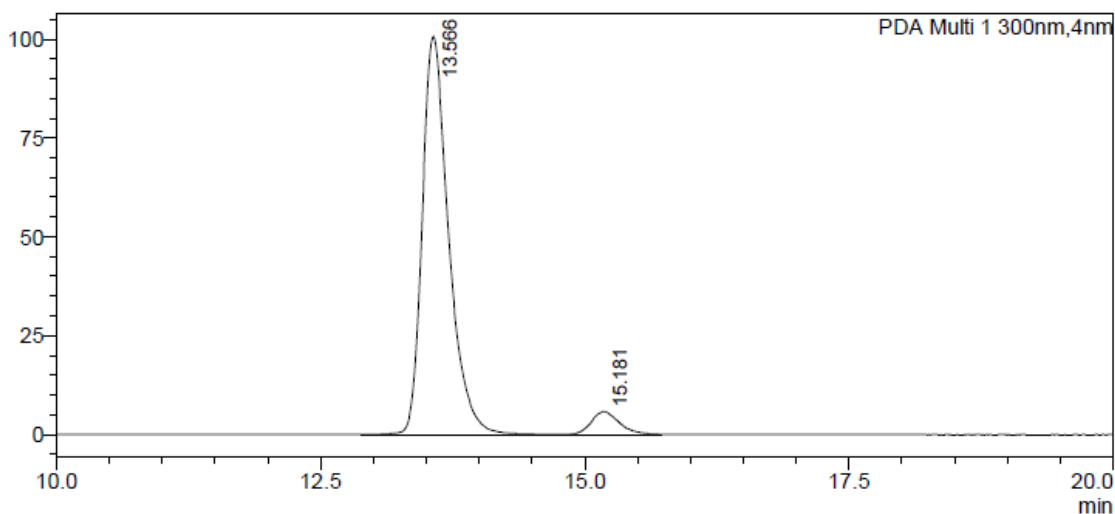

### <Peak Table>

PDA Ch1 300nm

| Peak# | Ret. Time | Area    | Height | Conc. | Unit | Area%   |
|-------|-----------|---------|--------|-------|------|---------|
| 1     | 13.566    | 1746535 | 100575 | 0.000 |      | 94.356  |
| 2     | 15.181    | 104464  | 5691   | 0.000 |      | 5.644   |
| Total |           | 1850998 | 106266 |       |      | 100.000 |

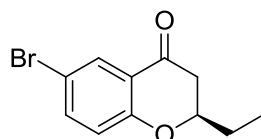

### <Chromatogram>

mAU

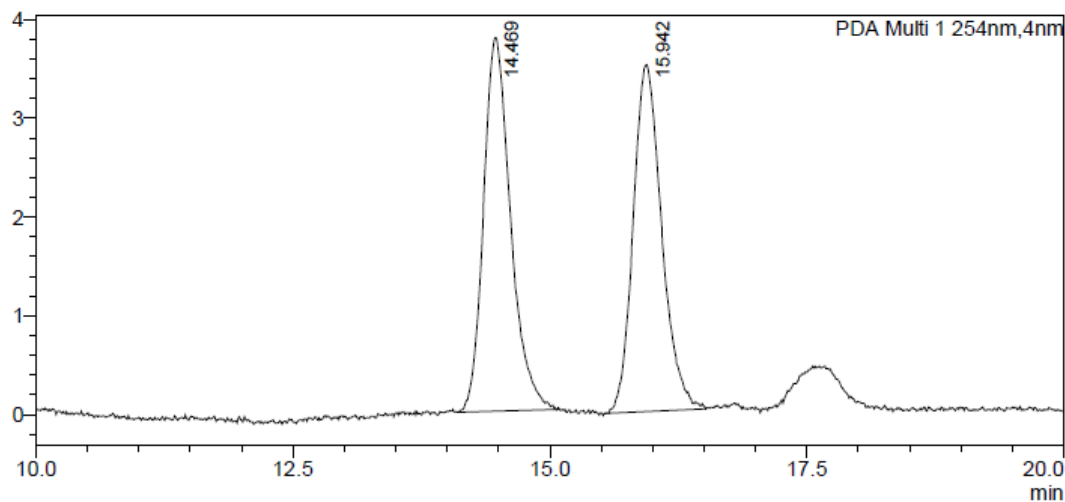

### <Peak Table>

PDA Ch1 254nm

| Peak# | Ret. Time | Area   | Height | Conc. | Unit | Area%   |
|-------|-----------|--------|--------|-------|------|---------|
| 1     | 14.469    | 69399  | 3780   | 0.000 |      | 50.619  |
| 2     | 15.942    | 67701  | 3508   | 0.000 |      | 49.381  |
| Total |           | 137100 | 7288   |       |      | 100.000 |

### <Chromatogram>

mAU

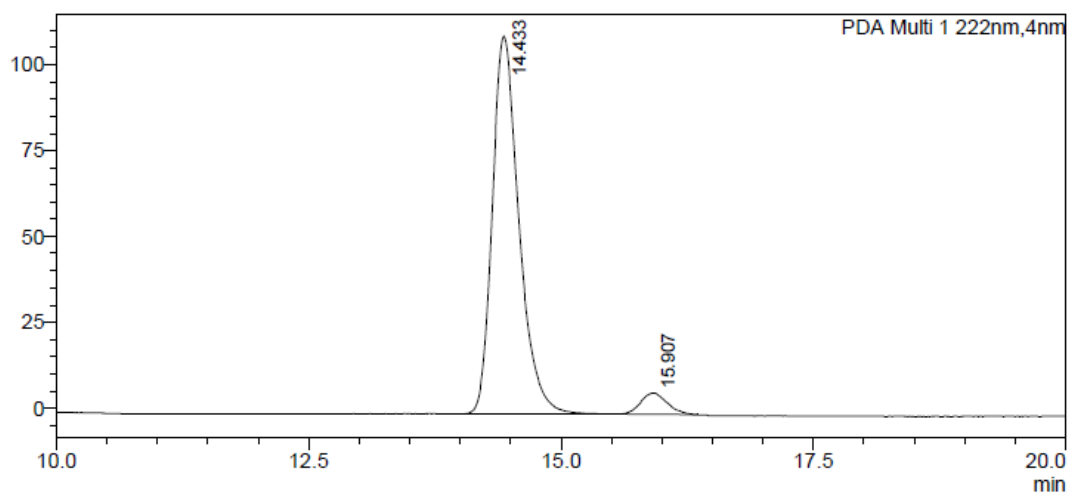

### <Peak Table>

PDA Ch1 222nm

| Peak# | Ret. Time | Area    | Height | Conc. | Unit | Area%   |
|-------|-----------|---------|--------|-------|------|---------|
| 1     | 14.433    | 2020386 | 109906 | 0.000 |      | 94.656  |
| 2     | 15.907    | 114059  | 6212   | 0.000 |      | 5.344   |
| Total |           | 2134445 | 116118 |       |      | 100.000 |

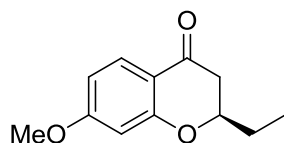

### <Chromatogram>

mAU

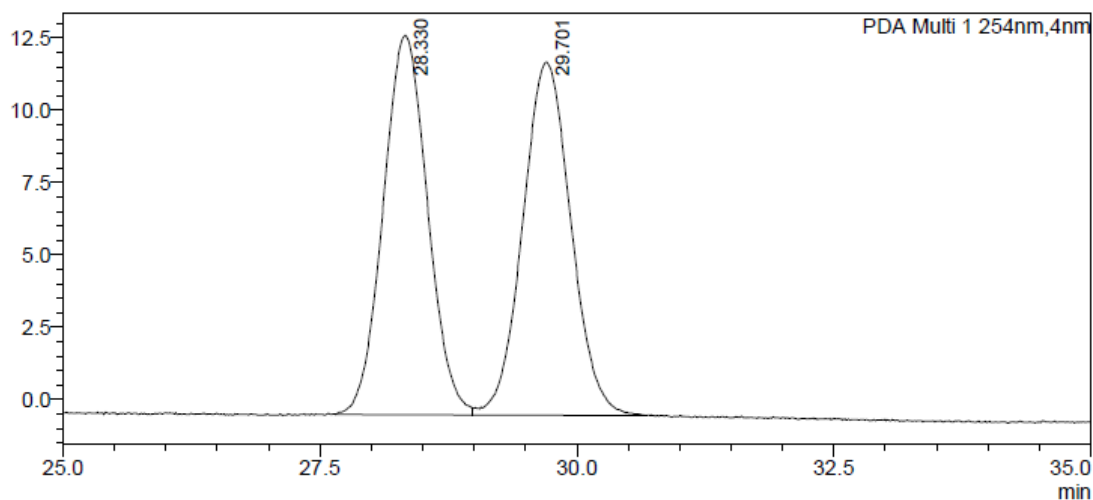

### <Peak Table>

PDA Ch1 254nm

| Peak# | Ret. Time | Area   | Height | Conc. | Unit | Area%   |
|-------|-----------|--------|--------|-------|------|---------|
| 1     | 28.330    | 394173 | 13103  | 0.000 |      | 49.733  |
| 2     | 29.701    | 398405 | 12200  | 0.000 |      | 50.267  |
| Total |           | 792578 | 25303  |       |      | 100.000 |

### <Chromatogram>

mAU

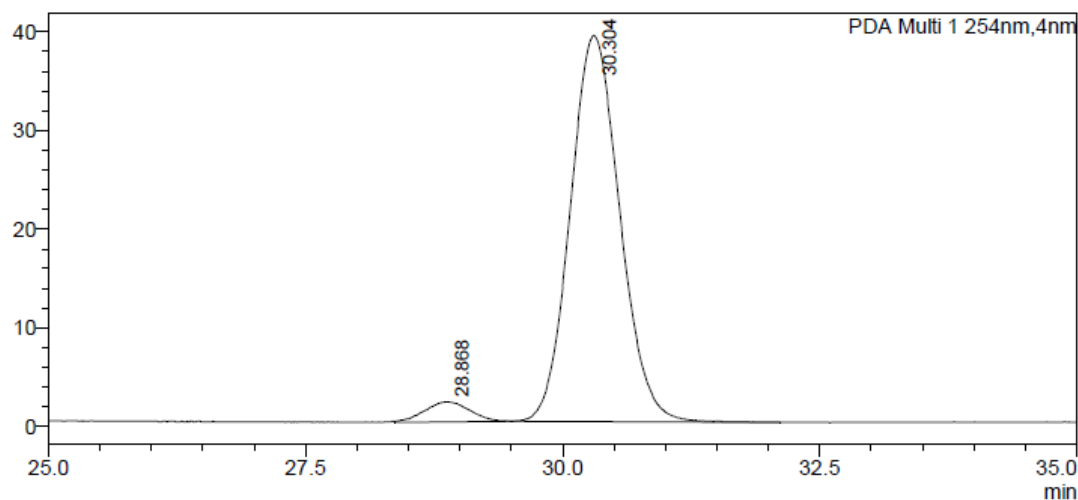

### <Peak Table>

PDA Ch1 254nm

| Peak# | Ret. Time | Area    | Height | Conc. | Unit | Area%   |
|-------|-----------|---------|--------|-------|------|---------|
| 1     | 28.868    | 62321   | 2037   | 0.000 |      | 4.534   |
| 2     | 30.304    | 1312316 | 39124  | 0.000 |      | 95.466  |
| Total |           | 1374637 | 41161  |       |      | 100.000 |



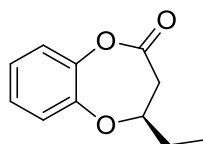

### <Chromatogram>

mAU

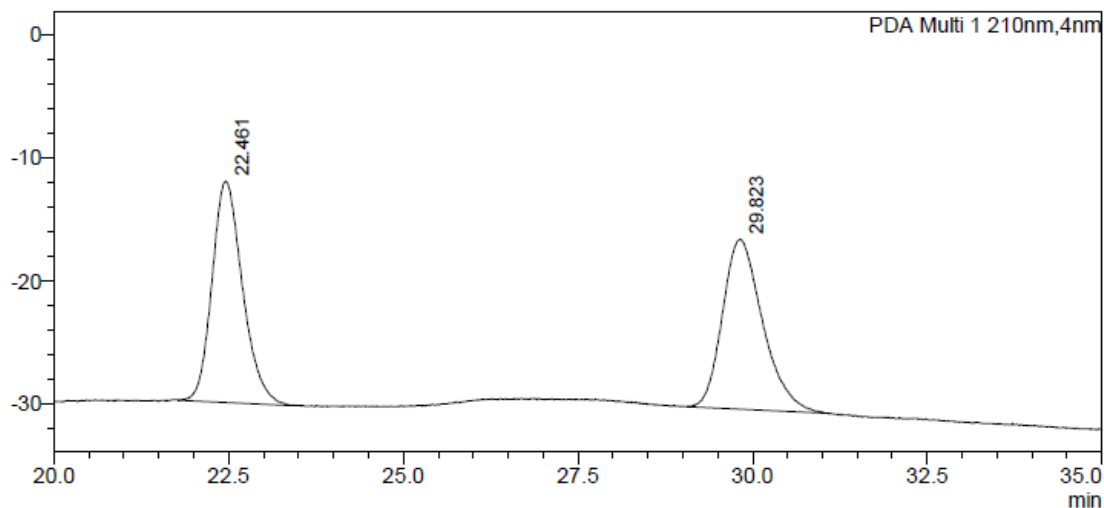

### <Peak Table>

PDA Ch1 210nm

| Peak# | Ret. Time | Area    | Height | Conc. | Unit | Area%   |
|-------|-----------|---------|--------|-------|------|---------|
| 1     | 22.461    | 544285  | 17975  | 0.000 |      | 49.772  |
| 2     | 29.823    | 549265  | 13777  | 0.000 |      | 50.228  |
| Total |           | 1093550 | 31753  |       |      | 100.000 |

### <Chromatogram>

mAU

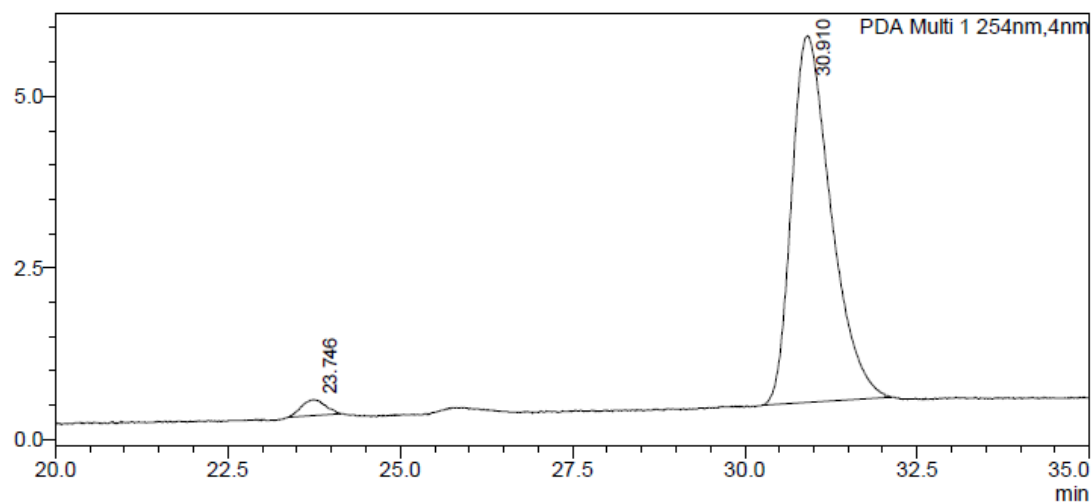

### <Peak Table>

PDA Ch1 254nm

| Peak# | Ret. Time | Area   | Height | Conc. | Unit | Area%   |
|-------|-----------|--------|--------|-------|------|---------|
| 1     | 23.746    | 5667   | 234    | 0.000 |      | 2.599   |
| 2     | 30.910    | 212369 | 5338   | 0.000 |      | 97.401  |
| Total |           | 218036 | 5572   |       |      | 100.000 |
